# Supplementary material for: Cross-sectional survey of sexual health professionals’ experiences and perceptions of the 2022 mpox outbreak in the UK
Source: PubMed Central journal article supplement — BMJ Open. 2024 Jan 12;14(1):e080250. doi: 10.1136/bmjopen-2023-080250 (PMC10806624; doi:10.1136/bmjopen-2023-080250), 2024-01-12
Supplement: bmjopen-2023-080250.draft_revisions.pdf [file bmjopen-2023-080250.draft_revisions.pdf]

# BMJ Open

BMJ Open is committed to open peer review. As part of this commitment we make the peer review history of every article we publish publicly available.

When an article is published we post the peer reviewers' comments and the authors' responses online. We also post the versions of the paper that were used during peer review. These are the versions that the peer review comments apply to.

The versions of the paper that follow are the versions that were submitted during the peer review process. They are not the versions of record or the final published versions. They should not be cited or distributed as the published version of this manuscript.

BMJ Open is an open access journal and the full, final, typeset and author-corrected version of record of the manuscript is available on our site with no access controls, subscription charges or pay-per-view fees (<http://bmjopen.bmj.com>).

If you have any questions on BMJ Open's open peer review process please email [info.bmjopen@bmj.com](mailto:info.bmjopen@bmj.com)

# BMJ Open

## A cross-sectional survey of healthcare workers' experiences and perceptions of the 2022 mpox outbreak in the United Kingdom

|                               |                                                                                                                                                                                                                                                                                                                                                                                                                                                                                                                                                                                                                                                                                                                                                                                                                                                                                                                                                                                                                                                                                                                                                                                         |
|-------------------------------|-----------------------------------------------------------------------------------------------------------------------------------------------------------------------------------------------------------------------------------------------------------------------------------------------------------------------------------------------------------------------------------------------------------------------------------------------------------------------------------------------------------------------------------------------------------------------------------------------------------------------------------------------------------------------------------------------------------------------------------------------------------------------------------------------------------------------------------------------------------------------------------------------------------------------------------------------------------------------------------------------------------------------------------------------------------------------------------------------------------------------------------------------------------------------------------------|
| Journal:                      | <i>BMJ Open</i>                                                                                                                                                                                                                                                                                                                                                                                                                                                                                                                                                                                                                                                                                                                                                                                                                                                                                                                                                                                                                                                                                                                                                                         |
| Manuscript ID                 | bmjopen-2023-080250                                                                                                                                                                                                                                                                                                                                                                                                                                                                                                                                                                                                                                                                                                                                                                                                                                                                                                                                                                                                                                                                                                                                                                     |
| Article Type:                 | Original research                                                                                                                                                                                                                                                                                                                                                                                                                                                                                                                                                                                                                                                                                                                                                                                                                                                                                                                                                                                                                                                                                                                                                                       |
| Date Submitted by the Author: | 25-Sep-2023                                                                                                                                                                                                                                                                                                                                                                                                                                                                                                                                                                                                                                                                                                                                                                                                                                                                                                                                                                                                                                                                                                                                                                             |
| Complete List of Authors:     | Hayes, Rosalie; Queen Mary University of London, SHARE Collaborative, Wolfson Institute of Population Health<br>Dakin, Francesca; University of Oxford, Nuffield Department of Primary Care Health Sciences<br>Smuk, Melanie; Queen Mary University of London, SHARE Collaborative, Blizard Institute<br>Paparini, Sara; Queen Mary University of London, SHARE Collaborative, Wolfson Institute of Population Health<br>Apea, Vanessa; Queen Mary University of London, SHARE Collaborative, Blizard Institute; Barts Health NHS Trust, Department of Infection and Immunity<br>Dewsnap, Claire; Sheffield Teaching Hospitals NHS Foundation Trust, Sexual Health; The University of Sheffield<br>Waters, L.; Central and North West London NHS Foundation Trust, Mortimer Market Centre; University College London, Institute for Global Health<br>Anderson, Jane ; Queen Mary University of London, SHARE Collaborative, Wolfson Institute of Population Health; Barts Health NHS Trust, Department of Infection and Immunity<br>Orkin, Chloe; Queen Mary University of London, SHARE Collaborative, Blizard Institute; Barts Health NHS Trust, Department of Infection and Immunity |
| Keywords:                     | Public health < INFECTIOUS DISEASES, Health Workforce, Health policy < HEALTH SERVICES ADMINISTRATION & MANAGEMENT                                                                                                                                                                                                                                                                                                                                                                                                                                                                                                                                                                                                                                                                                                                                                                                                                                                                                                                                                                                                                                                                      |
|                               |                                                                                                                                                                                                                                                                                                                                                                                                                                                                                                                                                                                                                                                                                                                                                                                                                                                                                                                                                                                                                                                                                                                                                                                         |

SCHOLARONE™  
Manuscripts

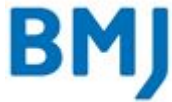

I, the Submitting Author has the right to grant and does grant on behalf of all authors of the Work (as defined in the below author licence), an exclusive licence and/or a non-exclusive licence for contributions from authors who are: i) UK Crown employees; ii) where BMJ has agreed a CC-BY licence shall apply, and/or iii) in accordance with the terms applicable for US Federal Government officers or employees acting as part of their official duties; on a worldwide, perpetual, irrevocable, royalty-free basis to BMJ Publishing Group Ltd ("BMJ") its licensees and where the relevant Journal is co-owned by BMJ to the co-owners of the Journal, to publish the Work in this journal and any other BMJ products and to exploit all rights, as set out in our [licence](#).

The Submitting Author accepts and understands that any supply made under these terms is made by BMJ to the Submitting Author unless you are acting as an employee on behalf of your employer or a postgraduate student of an affiliated institution which is paying any applicable article publishing charge ("APC") for Open Access articles. Where the Submitting Author wishes to make the Work available on an Open Access basis (and intends to pay the relevant APC), the terms of reuse of such Open Access shall be governed by a Creative Commons licence – details of these licences and which [Creative Commons](#) licence will apply to this Work are set out in our licence referred to above.

Other than as permitted in any relevant BMJ Author's Self Archiving Policies, I confirm this Work has not been accepted for publication elsewhere, is not being considered for publication elsewhere and does not duplicate material already published. I confirm all authors consent to publication of this Work and authorise the granting of this licence.

## Title

A cross-sectional survey of healthcare workers' experiences and perceptions of the 2022 mpox outbreak in the United Kingdom

## Authors

Rosalie Hayes<sup>1</sup>, Francesca Dakin<sup>2</sup>, Melanie Smuk<sup>3</sup>, Sara Papparini<sup>1</sup>, Vanessa Apea<sup>3,4</sup>, Claire Dewsnap<sup>5,6</sup>, Laura Waters<sup>7,8</sup>, Jane Anderson<sup>1,4</sup>, Chloe Orkin<sup>3,4</sup>

1 SHARE collaborative, Wolfson Institute of Population Health, Queen Mary University of London, London, UK.

2 Nuffield Department of Primary Care Sciences, University of Oxford, Oxford, UK

3 SHARE Collaborative, Blizard Institute, Queen Mary University of London, London, UK.

4 Department of Infection and Immunity, Barts Health NHS Trust, London, UK.

5 Sexual Health, Sheffield Teaching Hospital NHS Foundation Trust, Sheffield, UK.

6 The University of Sheffield, Sheffield, UK

7 Mortimer Market Center, Central and North West London NHS Foundation Trust, London, UK.

8 Institute for Global Health, University College London, London, UK.

## Corresponding author

Chloe Orkin, Centre for Immunology, Queen Mary University of London Barts and The London School of Medicine and Dentistry, London, E1 2AD, UK; [c.m.orkin@qmul.ac.uk](mailto:c.m.orkin@qmul.ac.uk)

## Abstract

**Objective:** To understand the experiences and perceptions of healthcare workers responding to the May 2022 mpox outbreak in the United Kingdom (UK).

**Design:** Cross-sectional, anonymous, online survey collecting quantitative and qualitative data. Convenience sample recruited via an international network of clinicians working on mpox and promoted through clinical associations and social media. Survey domains included mpox-related workload; preparedness, support, and training; safety at work; vaccination; and wellbeing. Qualitative descriptive analysis of free text responses was conducted to support interpretation of the quantitative data.

**Participants:** Participants who were employed as healthcare workers in the UK and had direct clinical experience of mpox were included in the analysis. The survey was completed between August and October 2022 by 145 UK healthcare workers, with most encountering mpox in sexual health clinics (89.0%) and HIV clinics (21.4%).

**Results:** The majority (70.8%) reported that they were required to respond to mpox in addition to their existing clinical responsibilities, with nearly half (47.6%) working longer hours as a result. Respondents noted that a lack of additional funding for mpox-related services combined with pre-existing pressures on sexual health services meant expectations around capacity to respond to mpox felt unrealistic and had negative implications for routine sexual health services. 68.3% of respondents reported experiencing some form of negative emotional impact due to their mpox work, with stress (59.3%), fatigue (44.1%) and anxiety (35.9%) being the most common symptoms. 35.0% stated that they were less likely to remain as a result of their experiences of the mpox outbreak.

**Conclusions:** With future infectious disease outbreaks an inevitability, these findings indicate that greater investment and coordination is required to ensure an effective national response and limit the negative impact on healthcare worker wellbeing.

## Strengths and Limitations

### *Strengths*

- This study is one of the first to explore the experiences of specialist UK healthcare workers responding to mpox, with data collected during the height of the outbreak.
- The collection of qualitative data via open-text questions helped to contextualise quantitative findings and centre healthcare workers' experiences and voices within the study.

### *Limitations*

- The convenience sampling strategy means the respondents and perspectives presented in this study may not be representative of the wider UK sexual and reproductive health workforce.
- The exploratory nature of the study constrained statistical analysis, as it was underpowered to explore associations between variables.

## Main text

### BACKGROUND

There is increasing awareness of the pressures that pandemics and their system-wide management place on healthcare workers' physical, mental, and emotional health (2). The arrival of SARS-Cov-2 exposed multiple threats to healthcare worker wellbeing including fear of contagion (and subsequent transmission to others), exacerbated by a lack of adequate PPE, inadequate and rapidly changing guidance and training, and inconsistent information (3–5). Staff also faced higher workloads, disruptions to daily routines and team dynamics, negative impacts on personal and professional identity, and threats to psychological safety (3,6). Outside of work, healthcare workers also experienced stigma in the community (related to fear of contagion) and disruptions to family relationships (3,5).

May 2022 marked the beginning of what became the largest and geographically most widespread mpox (formerly monkeypox) outbreak to be reported outside the principal historically affected countries in western and central Africa. Within 3 months the outbreak was declared a Public Health Emergency of International Concern by the World Health Organization (7), coinciding with a time when health systems were already significantly overstretched by the ongoing COVID-19 pandemic (8).

Known risk factors for acquiring mpox include contact with fomites, bodily fluids, and airborne droplets (9–11), and the most evidenced and protective non-behavioural intervention is the smallpox vaccine (12,13). The latest outbreak, however, differed from previous outbreaks and presented new challenges. First, the timing of the outbreak coincided with the lifting of travel and other restrictions associated with the COVID-19 pandemic, with early cases linked to the re-commencing of large events, parties and increases in close social and sexual contact (14). Secondly, unlike previous outbreaks of mpox, transmission has been associated with sexual networks of gay or bisexual men and other men who have sex with men. Thirdly, clinical presentation has changed and now frequently includes anogenital lesions (15). These combined factors have put healthcare workers employed within sexual health services on the frontline of the response.

1  
2  
3 In the UK, the unanticipated pressures of mpox were layered upon an already overstretched  
4 and depleted sexual and reproductive health workforce. In addition to COVID-19-associated  
5 disruption and burnout, sexual and reproductive health services were dealing with an ongoing  
6 crisis in recruitment and retention of staff (16–18) coupled with reduced funding and rising  
7 demand for services (19). Unlike most clinical services, sexual health services in England are  
8 funded from highly constrained local authority public health budgets rather than from central  
9 health system's funds in the National Health Service (NHS). As well as risking increased  
10 transmission of mpox, clinical leaders noted that unexpected and unfunded mpox clinical  
11 activity was competing with and displacing core sexual and reproductive health services,  
12 threatening the sustainability of services and public health (20).

21  
22 Given this context, mpox likely placed a significant burden on healthcare workers. However,  
23 beyond data on exposure risks of mpox in health care settings (21,22), little is known so far  
24 about the wider experience and impact of the outbreak on healthcare workers. We sought to  
25 address this gap by conducting a rapid appraisal of the experiences and perceptions of UK  
26 healthcare workers involved in the response to the 2022 multi-country mpox outbreak.

## 34 35 **METHODS**

36 Between August and October 2022, a cross-sectional, anonymous, online survey was  
37 conducted with international healthcare professionals involved in the multi-country  
38 outbreak of mpox. The survey contained 87 new (non-validated) questions, assessing:  
39 individuals' knowledge and confidence around mpox diagnosis and management; their  
40 views on outbreak preparedness, educational resources, workload, assessment of risk; and  
41 how the outbreak affected them emotionally and psychologically. Both closed (single- and  
42 multi-response questions) and open-text questions were used, as well as questions  
43 regarding demographic characteristics (e.g. age, gender identity, sexual orientation, and  
44 ethnicity). The survey was constructed using SmartSurvey software (SmartSurvey Ltd,  
45 Tewkesbury, UK) (23) and disseminated in English, Spanish, French and Portuguese.

55 International survey dissemination was via SHARE-Net (24), an informal network of  
56 researchers from the London-based Sexual Health and HIV All East Research Collaborative and  
57 clinicians from around the world, as well as via newsletters and social media channels of the  
58  
59  
60



1  
2  
3 British Association for Sexual Health (BASHH), the British HIV Association (BHIVA), European  
4 AIDS Clinical Society (EACS) and International AIDS Society (IAS).  
5  
6

7 The analysis for this paper was restricted to respondents who reported working as a  
8 healthcare professional residing in the UK, in order to better explore country- and context-  
9 specific factors which influenced healthcare workers' experiences. A manuscript analysing  
10 responses from the entire international sample is forthcoming.  
11  
12  
13

14  
15 Quantitative data analysis was undertaken by MS using Stata 17 (StataCorp LLC, College  
16 Station, TX, USA) (25) following a prespecified statistical analysis plan (available at  
17 <https://osf.io/2bufh>). All authors provided iterative feedback. Denominators (n) are shown in  
18 the text when missing responses occurred.  
19  
20  
21  
22

23 The qualitative data collected expanded in free text boxes on specific questions (e.g., "How  
24 satisfied were you with the support your clinic/service received from your national public  
25 health agency? Why/why not?"). Qualitative data were analysed using descriptive qualitative  
26 analysis (26) in NVivo v1.7 (Lumivero, Burlington, MA, USA) as a pragmatic approach to  
27 handling large numbers of entries of short textual data. RH produced the coding categories  
28 and brief findings under the question domains, with iterative feedback from remaining  
29 authors. Respondent quotations are provided in each section to provide context to the  
30 statistical findings.  
31  
32  
33  
34  
35  
36  
37  
38

39 The study received ethical approval from the Queen Mary University of London Ethics of  
40 Research Committee (QMERC22.297) and online informed consent was obtained from all  
41 respondents at the beginning of the questionnaire. No patient and public involvement was  
42 conducted as part of this study as the research was focused on the experiences of  
43 healthcare staff. We conducted a separate project to understand the experiences of  
44 communities affected by mpox which was co-produced with two community-based  
45 organisations involved in sexual health promotion and advocacy (1).  
46  
47  
48  
49  
50  
51

## 52 **RESULTS**

### 53 **Participant characteristics**

54 A total of 145 UK-based respondents completed the survey; their demographics are  
55 presented in Table 1. Most were doctors (73.8%) or nurses (24.8%). All respondents had been  
56 involved clinically (i.e. diagnosing and treating) with people with mpox. The main sites of care  
57  
58  
59  
60

for patients with mpox were sexual health clinics (89.0%), specialist HIV clinics (21.4%), inpatient wards (12.4%), and emergency departments (8.3%). Most respondents identified as women (70.3%), 25.5% identified as men (one of whom identified as a trans man), 1.4% identified as non-binary, and 2.1% of respondents preferred not to say. 13.8% of respondents identified as a gay or bisexual man, making up approximately half of the male respondents.

**Table 1. Survey respondent characteristics (n=145)**

| Category                                                                     | n   | %    |
|------------------------------------------------------------------------------|-----|------|
| <b>Age</b>                                                                   |     |      |
| 18-25                                                                        | 1   | 0.7  |
| 26-30                                                                        | 12  | 8.3  |
| 31-34                                                                        | 15  | 10.3 |
| 35-40                                                                        | 19  | 13.1 |
| 41-50                                                                        | 49  | 33.8 |
| 51-60                                                                        | 39  | 26.9 |
| 60+                                                                          | 10  | 6.9  |
| <b>Gender</b>                                                                |     |      |
| Women                                                                        | 102 | 70.3 |
| Men                                                                          | 38  | 26.2 |
| Non-binary                                                                   | 2   | 1.4  |
| Prefer not to say                                                            | 3   | 2.1  |
| <b>Do you identify as a gay or bisexual man?</b>                             |     |      |
| Yes                                                                          | 20  | 13.8 |
| No                                                                           | 122 | 84.1 |
| Prefer not to say                                                            | 3   | 2.1  |
| <b>Ethnicity</b>                                                             |     |      |
| White                                                                        | 115 | 79.3 |
| Black                                                                        | 3   | 2.1  |
| Asian                                                                        | 13  | 9.0  |
| Latino / Latinx                                                              | 1   | 0.7  |
| Arab                                                                         | 1   | 0.7  |
| Mixed or multiple ethnic groups                                              | 10  | 6.9  |
| Prefer not to say                                                            | 2   | 1.4  |
| <b>Professional role</b>                                                     |     |      |
| Doctor                                                                       | 107 | 73.8 |
| Nurse                                                                        | 36  | 24.8 |
| Health Promotion Worker                                                      | 2   | 1.4  |
| <b>Where did you see suspected or confirmed clinical cases of monkeypox?</b> |     |      |
| Sexual health clinic (community, public, private)                            | 130 | 89.0 |
| Infectious disease clinic                                                    | 4   | 2.8  |
| Emergency department                                                         | 12  | 8.3  |
| HIV clinic                                                                   | 31  | 21.4 |

|                    |    |      |
|--------------------|----|------|
| Dermatology clinic | 1  | 0.7  |
| General practice   | 1  | 0.7  |
| In-patient ward    | 18 | 12.4 |

### ***Mpox-related workload***

During the first four weeks of the UK mpox outbreak, over one third of respondents (34.0%) reported that at least quarter of their working time was taken up with mpox and 19.0% reported that more than half of their time was mpox-focused. The majority (70.8%) reported that their other existing clinical responsibilities had not been removed to allow them to focus on mpox-related work, with nearly half (47.6%) working longer hours as a result of mpox.

Respondents carried out a range of tasks as part of their mpox-related clinical work, most commonly direct patient care (97.2%), contacting mpox patients or their contacts (74.5%), and developing local protocols and operational guidance (59.1%).

Four themes were identified in the open-text data in relation to mpox-related workload: a lack of additional funding or resources, existing pressures on services, unrealistic expectations around capacity to respond to mpox, and the implications for other sexual health services.

Many respondents noted that the increased workload associated with mpox was not matched by additional funding or resources, with some describing a sense that mpox was being 'dumped' on sexual health services. Respondents had to work additional hours as a result and felt there was little recognition for this (including no financial reimbursement for overtime).

*"Expected to do a lot at speed with no additional support or resource."*

*Respondent 12 – Sexual Health and HIV doctor*

Others highlighted that understaffing due to COVID-19, along with previous budgetary cuts, meant that these additional responsibilities were being assigned to services already under extreme pressure.

1  
2  
3 *“I think even before covid the pressure within sexual health was such that it felt like you had*  
4 *to rush through patients and didn't have the time to give the care that was needed)”*

5  
6  
7  
8 *Respondent 10 – Nurse or Nurse Practitioner*

9  
10 Reporting requirements to the national public health agency, the UK Health Security Agency  
11 (UKHSA), added significant pressure. Some respondents felt that UKSHA's expectations of  
12 how sexual health services should respond to the outbreak were unrealistic.  
13  
14

15  
16 *“There was a significant mismatch between the resources we had and the resources we were*  
17 *expected to devote to the UKHSA processes (reporting cases, reporting on case*  
18 *management, patient follow-ups, attendance at meetings, infection control)”*

19  
20  
21  
22 *Respondent 78 – Sexual Health and HIV doctor*

23  
24 Respondents attributed this to a lack of understanding about the reality of sexual health  
25 services such as staffing levels, the logistics of applying guidance designed for highly  
26 controlled in-patient settings (where rare cases of mpox were previously dealt with) to  
27 open-access clinics, and having the infrastructure in place for services such as 24-hour on  
28 call rota.  
29  
30

31  
32  
33  
34 Several respondents were concerned about the impact on other sexual health services.

35  
36  
37 *“We have had acutely unwell patients EG: Herpes, PID [Pelvic Inflammatory Disease] care*  
38 *unacceptably delayed by the need to phone triage and prioritise monkey pox testing.”*

39  
40  
41  
42 *Respondent 25 – Sexual Health and HIV doctor*

### 43 44 **Preparedness, support, and training**

45  
46 When asked how personally prepared they were for the mpox outbreak, more than three-  
47 quarters (79.3%) of respondents said they were not at all or only slightly prepared (see Figure  
48 1). Over half (51.7%) of respondents had never heard of mpox prior to the outbreak.  
49 Respondents expressed a marked lack of confidence about their ability to care for people with  
50 mpox. Over half (56.6%) of respondents described themselves as not at all confident at the  
51 start of the outbreak, with 31.0% suggesting they had initially misdiagnosed a mpox-related  
52 rash.  
53  
54  
55  
56  
57  
58  
59  
60

1  
2  
3 **Figure 1. Perceptions of personal preparedness for mpox outbreak among survey**  
4 **respondents (n=145)**  
5

6  
7 *[Insert Figure 1 here]*  
8  
9

10  
11  
12 However, 78.6% had received education, training, or instruction about mpox specifically.  
13 Most commonly this was in the form of written guidance (61.4%), in-house practice education  
14 (55.2%), practical PPE instruction (33.8%), and lectures, webinars, or presentations (32.4%).  
15 Of those who had received mpox-related training or education and rated it (n=113), 11.5%  
16 rated this entirely adequate, 79.6% rated it fairly or mostly adequate, and 8.9% rated it only  
17 slightly or not at all adequate. Less than one third (29.0%) of respondents had completed any  
18 type of general infectious disease outbreak management education and training.  
19  
20  
21  
22  
23  
24

25  
26 Over half (63.4%) of all respondents agreed or strongly agreed that their employing institution  
27 had provided clear, timely and authoritative information about mpox. When asked how  
28 satisfied they were with the support their clinic or service received from the national public  
29 health agency (n=142), 62.6% said they were fairly, mostly or extremely satisfied, and 37.3%  
30 said they were only slightly or not at all satisfied.  
31  
32  
33  
34

35  
36 In the open text data, those who were satisfied with the response were understanding that  
37 the novelty of the outbreak meant that the public health agency lacked information about  
38 how best to respond, and guidance changed as understanding increased. Others said they felt  
39 the public health agency worked well with professional clinical bodies, and that the  
40 information and training provided was excellent.  
41  
42  
43  
44

45  
46 *“UKHSA's knowledge of the infection (which was unavoidably not based on any previous*  
47 *outbreak as sexually transmitted epidemics of mpox are unprecedented in the UK) was made*  
48 *available very early on too via BASHH [British Association of Sexual Health and HIV], which*  
49 *made the whole thing seem more serious and 'real' and helped mobilise resources (staff time*  
50 *and attention) to build the testing and referral pathways rapidly.”*  
51  
52  
53  
54

55 *Respondent 78 – Sexual Health and HIV doctor*  
56  
57

58 However, some respondents described a lack of strategic leadership which impeded an  
59 effective response to mpox. Several respondents described developing their own guidelines  
60

1  
2  
3 and procedures, and felt they were left to make decisions with little external support. Some  
4 respondents expressed their surprise that so little of the learning from managing COVID-19  
5 was being applied to the mpox outbreak.  
6  
7

8  
9 *“Each clinic was constantly reinventing the wheel by developing local protocols for MPXV*  
10 *patient management, PGD for vaccinations, vaccination procuring and delivery. This should*  
11 *all have been managed centrally. Nothing learned from the COVID pandemic has been*  
12 *translated to managing the MPXV response.”*  
13  
14  
15

16  
17 *Respondent 101 – Sexual Health and HIV doctor*  
18  
19

20 Respondents described how the absence of strategic leadership they identified led to poor  
21 communication, with clinicians learning about policy changes through the media or from  
22 patients and frequent changes in guidance. Some respondents felt that the mixed messaging  
23 (particularly in relation to vaccine supply) contributed to patients’ frustration, of which  
24 frontline clinicians bore the brunt. They felt the realities of sexual health clinical care were  
25 poorly understood.  
26  
27  
28  
29

30  
31 *“Poorly thought out, unhelpful, and mixed messaging from UKHSA. Unable to tell the truth*  
32 *to patients about vaccine supply leading to huge increase in abuse and aggression for*  
33 *frontline staff. Multiple meetings with multiple different groups- none of whom were talking*  
34 *to each other and many of whom had no idea how a sexual health clinic operated and*  
35 *sometimes clinicians weren’t even involved until 3 weeks into the outbreak.”*  
36  
37  
38  
39

40  
41 *Respondent 35 – Sexual Health and HIV doctor*  
42  
43

#### 44 **Safety at work**

45 The majority (n=85.4%, n=144) of respondents reported that their clinic or service had  
46 performed a risk assessment to ensure staff safety when dealing with people with suspected  
47 or confirmed mpox. 93.8% rated the mpox infection control precautions in their clinic or  
48 service as fairly, mostly, or entirely adequate. One respondent reported acquiring mpox,  
49 although it is unclear whether the exposure was occupational. Three respondents (2.1%)  
50 reported that colleagues had acquired mpox and no respondents reported family members  
51 acquiring mpox.  
52  
53  
54  
55  
56  
57  
58  
59  
60

1  
2  
3 In the open text data, some respondents expressed concerns about their safety at work, in  
4 particular those who felt especially at risk from complications from a potential infection, such  
5 as pregnancy, long-COVID, or planned surgery. Some reported feeling that their concerns  
6 were not adequately addressed by their employer.  
7  
8  
9

10  
11 *Being pregnant at the time, I didn't receive a risk assessment at all, just told 'to stay away*  
12 *from Monkeypox', yet I was around potential Monkeypox patients in the waiting room, in*  
13 *clinic and around colleagues seeing patients and diagnosing Monkeypox. Especially*  
14 *inadequate as I couldn't get vaccinated.*  
15  
16  
17  
18

19 *Respondent 76 – Sexual Health and HIV doctor*  
20

21 In contrast, some respondents felt that infection control procedures were prioritised over  
22 patient dignity, with the result that care provision was perceived to be stigmatising to  
23 patients. The downgrading of mpox from a high-consequence infectious disease (HCID)  
24 classification was perceived by some respondents to have taken too long, contributing to a  
25 sense that infection control requirements were excessive and potentially stigmatising given  
26 the perceived level of risk.  
27  
28  
29  
30  
31  
32

### 33 **Vaccination**

34  
35 Less than a quarter (22.9%) of respondents (n=144) had received smallpox vaccination prior  
36 to the 2022 mpox outbreak in the UK. By the time of the survey, 68.3% had been offered  
37 vaccination against mpox, of whom 71.0% had received the vaccine. However, of those  
38 vaccinated (n=86), 33.7% felt they had not received the vaccine in a timely and equitable  
39 manner. Overall, 53.5% of respondents (n=144) considered mpox vaccination access in the  
40 UK to be inadequate, with the key focus being on access for patients. The term “chaotic” was  
41 used by several to describe vaccine delivery to patients, and some respondents felt they were  
42 made to provide misleading information to patients about vaccine availability. Several  
43 respondents described how the inadequate vaccine supply and poor communication around  
44 this meant that delivery was inequitable in its impact on marginalised patients.  
45  
46  
47  
48  
49  
50  
51  
52

53  
54 *“Not fair that we can't vaccinate everyone in need and that outside London coverage has*  
55 *been terrible. Also, that there's been no decent public messaging, and everything's had to be*  
56 *spread through word of mouth. Disadvantages the un-connected gays.”*  
57  
58  
59  
60

*Respondent 88 – Sexual Health and HIV doctor***Wellbeing**

Ninety-nine respondents (68.3%) reported experiencing some form of negative emotional impact due to their mpox work, with 50.3% reporting multiple symptoms. As depicted in Figure 2, the most commonly reported symptoms were stress (59.3%), fatigue (44.1%) and anxiety (35.9%). Stress, fatigue and anxiety were also the most common symptoms experienced by respondents prior to their work on mpox, but at lower rates (38.6%, 31.7%, 19.3%, respectively).

**Figure 2. Symptoms experienced by healthcare workers during and prior to mpox outbreak (n=145)**

*[Insert Figure 2 here]*

A substantial proportion of respondents reported feeling some level of burnout, either as a result of responding to mpox and COVID-19, or even prior to these outbreaks. 11.7% of all respondents reported feeling considerably or completely burnt out due to their work on mpox, while 53.8% reported feeling slight or moderate feelings of burnout, and 34.5% reported feeling not at all burnt out. Of the 83 (57.2%) respondents who had provided care to COVID-19 patients in the preceding two years, 12.0% reported feeling considerably or completely burnt out prior to the COVID-19 pandemic, 55.4% reported feeling slight or moderate feelings of burnout, and 32.5% reported feeling not at all burnt out.

When asked whether the experience of mpox in addition to the COVID-19 pandemic made them more or less likely to remain in health as a profession, 35.0% stated that they were less likely to remain, only 4.2% stated they were more likely to remain, and the remainder (60%) reported no change.

Many respondents ascribed these feelings to exhaustion from having to deal with another outbreak so soon after COVID-19. Some respondents felt that there was a lack of acknowledgement or consideration for the pressure that staff were already under prior to the mpox outbreak.



1  
2  
3 *Although clinically challenging (...), this work coincided with increasing service pressures, and*  
4 *without a resolution of the Covid pandemic (still very stressful to staff). We have had to*  
5 *adapt and shift other clinical tasks, redesign clinics and services without necessarily*  
6 *acknowledging the amount of low staff morale and distress we have all been through.*  
7  
8  
9

10  
11 *Participant 50 – Sexual Health and HIV doctor*  
12

13  
14 Some respondents described how understaffing meant they did not always feel they could  
15 deliver adequate care, which exacerbated their stress. In addition, some felt the way in which  
16 the mpox response was handled contributed to the distress and anger of patients.  
17  
18

19  
20 *Listening to the very distressing accounts from the MPX patients especially those who are*  
21 *frightened & isolating alone and not being able help or support them better.*  
22  
23

24 *Participant 8 – Sexual Health and HIV doctor*  
25

26  
27 A few respondents expressed anger at patients who they felt did not take the outbreak  
28 seriously or lacked empathy for the situation clinicians also found themselves in.  
29  
30

## 31 DISCUSSION

32  
33 Our study, undertaken at the intersection of two major infectious disease outbreaks in the  
34 UK in 2022 gives important insights into the challenges that pandemics pose to healthcare  
35 workers. It is one of the first studies to explore the experiences of specialist UK healthcare  
36 workers responding to mpox, with data collected at the height of the outbreak. Through the  
37 combination of quantitative and qualitative data, our findings paint a picture of an  
38 understaffed, under-resourced and underprepared workforce with little resilience to adapt  
39 to the challenges of a novel outbreak soon after a recent pandemic. Staff wellbeing has  
40 suffered, with high levels of stress and burnout contributing to staff reporting that they are  
41 more likely to leave their profession.  
42  
43  
44  
45  
46  
47  
48

49  
50 The experiences of respondents in our study reinforce the view that mpox landed on  
51 services that were already under huge financial and workforce pressure. Previous studies  
52 have identified that inadequate funding and resources for the mpox response has had  
53 implications for routine sexual health care – risking efforts to tackle the competing public  
54 health threats of HIV and increasing STI rates. A service evaluation of a UK clinic described  
55 the temporary cancellation of routine sexual health services, such as warts clinics and  
56  
57  
58  
59  
60

1  
2  
3 vaccinations, in response to the increased workload brought about by the mpox outbreak  
4 (27). Similarly, a US study reported a significant decline in HIV PrEP enrolment and STI  
5 testing when STI care was deprioritised by a need to upscale mpox vaccination with limited  
6 staff resource (28). HIV testing rates among certain population groups such as heterosexual  
7 men and heterosexual and bisexual women are yet to return to the levels they were prior to  
8 the COVID-19 pandemic (29). Disruption to routine sexual health services including HIV  
9 testing threatens the UK's progress towards elimination of HIV transmission.  
10  
11  
12  
13  
14  
15

16 In addition to concerns about their ability to deliver core sexual health services, respondents  
17 highlighted worries about their ability to ensure optimal care for people with and/or at risk  
18 of mpox. A key source of distress identified by this study was the rapidly changing and  
19 inadequate information and guidance – also highlighted as an issue by UK healthcare  
20 workers responding to the COVID-19 pandemic (4). This does not appear to be unique to the  
21 UK, with healthcare workers across the globe grappling with a quagmire of fluctuating (and  
22 sometimes contradictory) mpox policies and guidance during the outbreak (30), combined  
23 with the additional pressure of vaccine shortage and inequitable global provision (31).  
24 Rapidly changing guidance has knock-on effects for affected communities: our previous  
25 survey of communities at risk of mpox in the UK highlighted perceptions of poor  
26 communication by health authorities and a lack of trust in the early public health response  
27 to mpox, especially among groups who already face social and structural barriers to care (1).  
28 Producing reliable, coordinated, and consistent guidance is a common challenge in novel  
29 outbreaks where knowledge is evolving, and it takes time for consensus to emerge.  
30 However, while some examples of effective collaboration were highlighted in this study,  
31 concerns about a lack of strategic coordination nationally and conflicting messaging indicate  
32 that communication and coordination between key stakeholders must be improved to avoid  
33 repeating past mistakes. Lessons can be learned from other countries as well as previous  
34 epidemics – a recent policy report on the UK mpox response pointed to the United States  
35 government's national mpox response team as an example of strategic leadership “between  
36 and within organisations” (32).  
37  
38  
39  
40  
41  
42  
43  
44  
45  
46  
47  
48  
49  
50  
51  
52  
53  
54

55 Encouragingly, we found high levels of acceptability of mpox vaccination among UK  
56 healthcare workers, which contrasts with findings from other countries (33–36). Most  
57 respondents felt safe at work, with very few mpox acquisitions reported. This corresponds  
58  
59  
60

1  
2  
3 with the reported low number of cases of occupational transmission of mpox across Europe  
4 (37). Notably, most of the respondents to this survey encountered mpox in outpatient  
5 services, where the risk of occupational infection is expected to be lower than inpatient  
6 settings (38,39).  
7  
8  
9

10  
11 Finally, the high levels of stress, fatigue, and anxiety reported by healthcare workers  
12 responding to mpox are deeply concerning. This issue is endemic in the NHS more generally,  
13 with 44.8% of NHS staff reported feeling unwell due to work-related stress in 2022 (40).  
14 While COVID-19 undoubtedly created new pressures (41), poor mental health among  
15 healthcare workers pre-dates the pandemic and the mpox outbreak (42). As well as being  
16 challenging for staff, this also presents economic implications for the health system (poor  
17 staff wellbeing has been estimated as costing the NHS £12.1 billion a year (43)) and  
18 implications for the quality and safety of patient care (44).  
19  
20  
21  
22  
23  
24  
25

26 The study has limitations, and our findings should be interpreted with caution. This is a  
27 convenience sample and although respondents were broadly reflective of the sexual and  
28 reproductive health workforce in terms of gender, ethnicity, and age (45), it cannot be  
29 described as representative. Using a single source of data (a survey), may have resulted in  
30 limited representation of healthcare workers' views. Due to the exploratory nature of the  
31 study, a power calculation was not conducted; consequently statistical analysis was limited  
32 to describing results as the study was underpowered to explore associations between  
33 variables and potential differences between subgroups (e.g., based on gender, professional  
34 role, geography, race and ethnicity). Further, those who responded to the open text  
35 questions and provided lengthier responses were generally those with negative experiences  
36 of responding to the outbreak. Further research is needed to explore inequities in  
37 healthcare workers' experiences of the mpox outbreak and to identify protective factors  
38 which supported more positive experiences that can shape responses in the future.  
39  
40  
41  
42  
43  
44  
45  
46  
47  
48  
49  
50

## 51 CONCLUSION

52 With future infectious disease outbreaks an inevitability, these findings indicate that greater  
53 investment and coordination is required to ensure an effective national response and limit  
54 any negative impact on healthcare worker wellbeing. Sexual health services need adequate  
55 funding to support outbreak preparedness, address existing epidemics, and improve  
56  
57  
58  
59  
60

1  
2  
3 workforce retention. Mechanisms to improve strategic coordination and communication  
4 between key stakeholders, including representatives of clinicians and affected populations,  
5 is vital to ensure clear and consistent messaging. Finally, sustained investment in  
6 coordinated, equitable partnerships between government agencies, clinical services, and  
7 communities on the ground are essential to deliver evidence-based interventions to support  
8 healthcare worker wellbeing, sustain patient-provider relationships, and promote  
9 psychological resilience.  
10  
11  
12  
13  
14  
15  
16  
17  
18  
19  
20  
21  
22  
23  
24  
25  
26  
27  
28  
29  
30  
31  
32  
33  
34  
35  
36  
37  
38  
39  
40  
41  
42  
43  
44  
45  
46  
47  
48  
49  
50  
51  
52  
53  
54  
55  
56  
57  
58  
59  
60

For peer review only

## Acknowledgements

With thanks to the participants for contributing their time and sharing their experiences; to the Share-Net international collaboration for their support in disseminating the survey; and to Dr Anthony K J Smith for his support on the qualitative analysis for the entire survey sample, which has helped to inform this study's findings.

## Data sharing statement

The authors commit to making the relevant anonymised participant level data available on reasonable request and following consultation with the Queen Mary University of London Ethics of Research Committee.

## Copyright statement

The Corresponding Author has the right to grant on behalf of all authors and does grant on behalf of all authors, an exclusive licence (or non-exclusive for government employees) on a worldwide basis to the BMJ Publishing Group Ltd to permit this article (if accepted) to be published in BMJ editions and any other BMJ PGL products and sublicences such use and exploit all subsidiary rights, as set out in our licence.

## Competing interests statement

All authors have completed the Unified Competing Interest form (available on request from the corresponding author) and declare no support from any organisation for the submitted work.

VA has received speaker fees from ViiV, Gilead and MSD. CD has received speaker fees from ViiV and MSD. JA has received speaker fees, consultancy fees and support for conference attendance from Gilead Sciences and ViiV Healthcare. CO has received research grants paid to her institution from MSD, GSK, Gilead, ViiV, AstraZeneca, and honoraria from MSD, GSK, Gilead, and ViiV.

1  
2  
3 JA holds a consultant physician appointment at Homerton Healthcare NHS Foundation Trust  
4 and is Chair of the National AIDS Trust. LW is former president of the British HIV Association.  
5  
6 CD is current president of the British Association for Sexual Health and HIV.  
7  
8

9 All other authors have no further competing interests to declare.  
10  
11

## 12 13 Transparency statement

14  
15 The lead author (the manuscript's guarantor) affirms that the manuscript is an honest,  
16 accurate, and transparent account of the study being reported; that no important aspects of  
17 the study have been omitted; and that any discrepancies from the study as planned (and, if  
18 relevant, registered) have been explained.  
19  
20  
21  
22

## 23 24 Ethical approval

25  
26 The study received ethical approval from the Queen Mary University of London Ethics of  
27 Research Committee (QMERC22.297).  
28  
29  
30

## 31 32 Funding

33  
34 The authors received no funding for the research, authorship, and/or publication of this  
35 article.  
36  
37  
38  
39  
40  
41  
42  
43  
44  
45  
46  
47  
48  
49  
50  
51  
52  
53  
54  
55  
56  
57  
58  
59  
60

## References

1. Paparini S, Whitacre R, Smuk M, Thornhill J, Mwendera C, Strachan S, et al. Public understanding and awareness of and response to monkeypox virus outbreak: A cross-sectional survey of the most affected communities in the United Kingdom during the 2022 public health emergency. *HIV Med.* 2023;24(5):544–57.
2. Shaw A, Flott K, Fontana G, Durkin M, Darzi A. No patient safety without health worker safety. *The Lancet.* 2020 Nov 14;396(10262):1541–3.
3. Billings J, Ching BCF, Gkofa V, Greene T, Bloomfield M. Experiences of frontline healthcare workers and their views about support during COVID-19 and previous pandemics: a systematic review and qualitative meta-synthesis. *BMC Health Serv Res.* 2021 Sep 6;21(1):923.
4. Vindrola-Padros C, Andrews L, Dowrick A, Djellouli N, Fillmore H, Gonzalez EB, et al. Perceptions and experiences of healthcare workers during the COVID-19 pandemic in the UK. *BMJ Open.* 2020;10(11):e040503.
5. Hoernke K, Djellouli N, Andrews L, Lewis-Jackson S, Manby L, Martin S, et al. Frontline healthcare workers' experiences with personal protective equipment during the COVID-19 pandemic in the UK: a rapid qualitative appraisal. *BMJ Open.* 2021;11(1):e046199.
6. Grailey K, Lound A, Brett S. Lived experiences of healthcare workers on the front line during the COVID-19 pandemic: a qualitative interview study. *BMJ Open.* 2021;11(12):e053680.
7. World Health Organization. WHO Director-General declares the ongoing monkeypox outbreak a Public Health Emergency of International Concern [Internet]. [cited 2023 Jul 9]. Available from: <https://www.who.int/europe/news/item/23-07-2022-who-director-general-declares-the-ongoing-monkeypox-outbreak-a-public-health-event-of-international-concern>
8. Golden MR, Wasserheit JN. Monkeypox — A Sobering Sentinel for Pandemic Preparedness and Sexual Health System Capacity. *N Engl J Med.* 2022 Nov 17;387(20):1826–9.
- 9.

- 1  
2  
3 9. Bunge EM, Hoet B, Chen L, Lienert F, Weidenthaler H, Baer LR, et al. The changing  
4 epidemiology of human monkeypox—A potential threat? A systematic review. *PLoS Negl*  
5 *Trop Dis.* 2022 Feb 11;16(2):e0010141.  
6  
7
- 8  
9 10. Titanji BK, Tegomoh B, Nematollahi S, Konomos M, Kulkarni PA. Monkeypox: A  
10 Contemporary Review for Healthcare Professionals. *Open Forum Infect Dis.* 2022 Jun  
11 23;9(7):ofac310.  
12  
13
- 14 11. Beer EM, Rao VB. A systematic review of the epidemiology of human monkeypox  
15 outbreaks and implications for outbreak strategy. *PLoS Negl Trop Dis.* 2019 Oct  
16 16;13(10):e0007791.  
17  
18
- 19 12. FINE PEM, JEZEK Z, GRAB B, DIXON H. The Transmission Potential of Monkeypox  
20 Virus in Human Populations. *Int J Epidemiol.* 1988 Sep 1;17(3):643–50.  
21  
22
- 23 13. Centers for Disease Control and Prevention (CDC). Centers for Disease Control and  
24 Prevention. 2023 [cited 2023 Jul 9]. Mpox in the U.S. Available from:  
25 <https://www.cdc.gov/poxvirus/mpox/clinicians/vaccines/vaccine-considerations.html>  
26  
27
- 28 14. Kluge H, Ammon A. Monkeypox in Europe and beyond – tackling a neglected disease  
29 together. Vol. 27, *Eurosurveillance.* 2022. p. 2200482.  
30  
31
- 32 15. Thornhill JP, Barkati S, Walmsley S, Rockstroh J, Antinori A, Harrison LB, et al.  
33 Monkeypox Virus Infection in Humans across 16 Countries — April–June 2022. *N Engl J Med.*  
34 2022 Aug 25;387(8):679–91.  
35  
36
- 37 16. Selwyn B, Nguyen H, Cochrane E, Lim J, Cartner E, Cannon L, et al. P108 STASHH: a  
38 junior speciality association addressing the GUM recruitment crisis. *Sex Transm Infect.* 2022  
39 Jun 1;98(Suppl 1):A72–3.  
40  
41
- 42 17. The Royal College of Nursing [Internet]. The Royal College of Nursing; 2018 [cited  
43 2023 Jul 7]. Sexual and Reproductive Health. RCN report on the impact of funding and  
44 service changes in England. | Royal College of Nursing. Available from:  
45 <https://www.rcn.org.uk/Professional-Development/publications/pdf-006962>  
46  
47  
48  
49  
50  
51  
52  
53  
54  
55  
56  
57  
58  
59  
60



18. Health and Social Care Committee. Sexual health: Fourteenth Report of Session 2017–19 [Internet]. 2019 Jun [cited 2023 Jul 7] p. 37–9. Report No.: (HC 1419). Available from: <https://publications.parliament.uk/pa/cm201719/cmselect/cmhealth/1419/1419.pdf>
19. Waters A. Sexual health services are at “breaking point” after £1bn in cuts since 2015. *BMJ*. 2022 Nov 16;379:o2766.
20. Monkeypox - call for action from sexual health sector [Internet]. [cited 2023 Jul 26]. Available from: <https://www.bhiva.org/joint-letters-on-monkeypox>
21. Fleischauer AT, Kile JC, Davidson M, Fischer M, Karem KL, Teclaw R, et al. Evaluation of human-to-human transmission of monkeypox from infected patients to health care workers. *Clin Infect Dis Off Publ Infect Dis Soc Am*. 2005 Mar 1;40(5):689–94.
22. Vaughan A, Aarons E, Astbury J, Brooks T, Chand M, Flegg P, et al. Human-to-Human Transmission of Monkeypox Virus, United Kingdom, October 2018. *Emerg Infect Dis*. 2020 Apr;26(4):782–5.
23. SmartSurvey Ltd. SmartSurvey. Gloucester, UK; 2023.
24. Thornhill JP, Palich R, Ghosn J, Walmsley S, Moschese D, Cortes CP, et al. Human monkeypox virus infection in women and non-binary individuals during the 2022 outbreaks: a global case series. *The Lancet*. 2022;400(10367):1953–65.
25. StataCorp. Stata Statistical Software: Release 17. College Station, TX: StataCorp LLC; 2021.
26. Doyle L, McCabe C, Keogh B, Brady A, McCann M. An overview of the qualitative descriptive design within nursing research. *J Res Nurs JRN*. 2020 Aug;25(5):443–55.
27. Lorking N, Le Bihan A, Teh YS, Smart R, Wainwright E, Pocock M. Monkeypox: A British sexual health clinic’s experience of applying lessons from the COVID-19 pandemic. *Int J STD AIDS*. 2023 Jun;34(7):501–4.
28. Stewart J, Bartkus M, Sperring H, Ruiz-Mercado G, Johnson S, Pierre C. Monkeypox Vaccination Strategy and Missed Opportunities in STI and HIV Prevention: An Urban Sexual Health Clinic’s Experience During a Public Health Emergency. *Open Forum Infect Dis*. 2023 Jan 1;10(1):ofad006.

- 1  
2  
3  
4  
5  
6  
7  
8  
9  
10  
11  
12  
13  
14  
15  
16  
17  
18  
19  
20  
21  
22  
23  
24  
25  
26  
27  
28  
29  
30  
31  
32  
33  
34  
35  
36  
37  
38  
39  
40  
41  
42  
43  
44  
45  
46  
47  
48  
49  
50  
51  
52  
53  
54  
55  
56  
57  
58  
59  
60
29. Lester J, Martin V, Shah, A, Chau, C, Mackay, N, Newbigging-Lister, A, et al. HIV testing, PrEP, new HIV diagnoses, and care outcomes for people accessing HIV services: 2022 report. The annual official statistics data release (data to end of December 2021). London: UK Health Security Agency; 2022 Oct.
30. Webb E, Rigby I, Michelen M, Dagens A, Cheng V, Rojek AM, et al. Availability, scope and quality of monkeypox clinical management guidelines globally: a systematic review. *BMJ Glob Health*. 2022;7(8):e009838.
31. Taylor L. Monkeypox: Concerns mount over vaccine inequity. *BMJ*. 2022 Aug 8;378:o1971.
32. Garcia Iglesias J, Williams J, Nagington M, May T, Buijsen S, McHugh C, et al. Responding to Mpox: Communities, Communication, and Infrastructures. 2023 Mar.
33. Riad A, Drobov A, Rozmarinová J, Drapáčová P, Klugarová J, Dušek L, et al. Monkeypox Knowledge and Vaccine Hesitancy of Czech Healthcare Workers: A Health Belief Model (HBM)-Based Study. *Vaccines*. 2022 Dec;10(12):2022.
34. Bates BR, Grijalva MJ. Knowledge, attitudes, and practices towards monkeypox during the 2022 outbreak: An online cross-sectional survey among clinicians in Ohio, USA. *J Infect Public Health*. 2022 Dec;15(12):1459–65.
35. Ghazy RM, Okeh DU, Sallam M, Hussein M, Ismail HM, Yazbek S, et al. Psychological Antecedents of Healthcare Workers towards Monkeypox Vaccination in Nigeria. *Vaccines*. 2022 Dec;10(12):2151.
36. Lounis M, Bencherit D, Abdelhadi S. Knowledge and awareness of Algerian healthcare workers about human monkeypox and their attitude toward its vaccination: An online cross-sectional survey. *Vacunas*. 2023 Apr 1;24(2):122–7.
37. Joint ECDC-WHO Regional Office for Europe Mpox Surveillance Bulletin [Internet]. [cited 2023 Jul 26]. Available from: <https://monkeypoxreport.ecdc.europa.eu/>
38. Atkinson B, Spencer A, Onianwa O, Furneaux J, Grieves J, Nicholls I, et al. Longitudinal mpox virus surface sampling in an outpatient setting. *J Hosp Infect*. 2023 May 1;135:196–8.

- 1  
2  
3 39. Gould S, Atkinson B, Onianwa O, Spencer A, Furneaux J, Grieves J, et al. Air and  
4 surface sampling for monkeypox virus in a UK hospital: an observational study. *Lancet*  
5 *Microbe*. 2022 Dec 1;3(12):e904–11.  
6  
7  
8  
9 40. NHS. NHS Staff Survey National Results: National Results Briefing 2022 [Internet].  
10 2022. Available from: <https://www.nhsstaffsurveys.com/results/national-results/>  
11  
12  
13 41. Brier ND, Stroobants S, Vandekerckhove P, Buck ED. Factors affecting mental health  
14 of health care workers during coronavirus disease outbreaks (SARS, MERS & COVID-19): A  
15 rapid systematic review. *PLOS ONE*. 2020 Dec 15;15(12):e0244052.  
16  
17  
18 42. Wilkinson E. UK NHS staff: stressed, exhausted, burnt out. *The Lancet*. 2015 Mar  
19 7;385(9971):841–2.  
20  
21  
22 43. Daniels K, Connolly S, Woodard R, van Stolk C, Patey J, Fong K, et al. NHS staff  
23 wellbeing: Why investing in organisational and management practices makes business sense  
24 - A rapid evidence review and economic analysis. London: EPPI Centre, UCL Social Research  
25 Institute, University College London.; 2022.  
26  
27  
28 44. Hall LH, Johnson J, Watt I, Tsipa A, O'Connor DB. Healthcare Staff Wellbeing,  
29 Burnout, and Patient Safety: A Systematic Review. *PLOS ONE*. 2016 Jul 8;11(7):e0159015.  
30  
31  
32 45. J, Sherrard. GUM Workforce Report. 2022 Oct.  
33  
34  
35  
36  
37  
38  
39  
40  
41  
42  
43  
44  
45  
46  
47  
48  
49  
50  
51  
52  
53  
54  
55  
56  
57  
58  
59  
60

1  
2  
3  
4  
5  
6  
7  
8  
9  
10  
11  
12  
13  
14  
15  
16  
17  
18  
19  
20  
21  
22  
23  
24  
25  
26  
27  
28  
29  
30  
31  
32  
33  
34  
35  
36  
37  
38  
39  
40  
41  
42  
43  
44  
45  
46  
47  
48  
49  
50  
51  
52  
53  
54  
55  
56  
57  
58  
59  
60

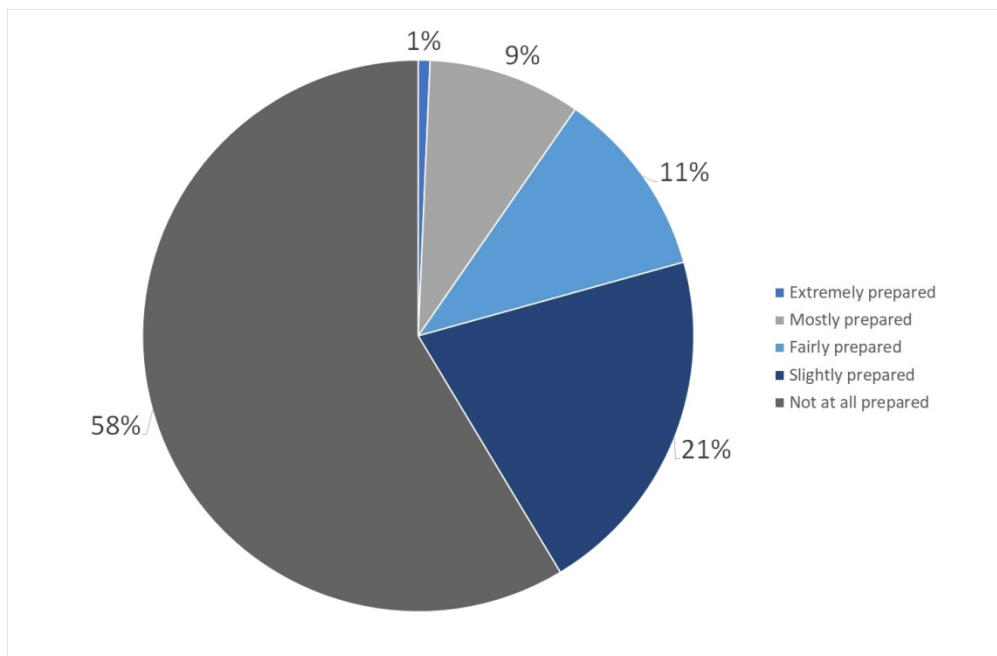

258x168mm (144 x 144 DPI)

1  
2  
3  
4  
5  
6  
7  
8  
9  
10  
11  
12  
13  
14  
15  
16  
17  
18  
19  
20  
21  
22  
23  
24  
25  
26  
27  
28  
29  
30  
31  
32  
33  
34  
35  
36  
37  
38  
39  
40  
41  
42  
43  
44  
45  
46  
47  
48  
49  
50  
51  
52  
53  
54  
55  
56  
57  
58  
59  
60

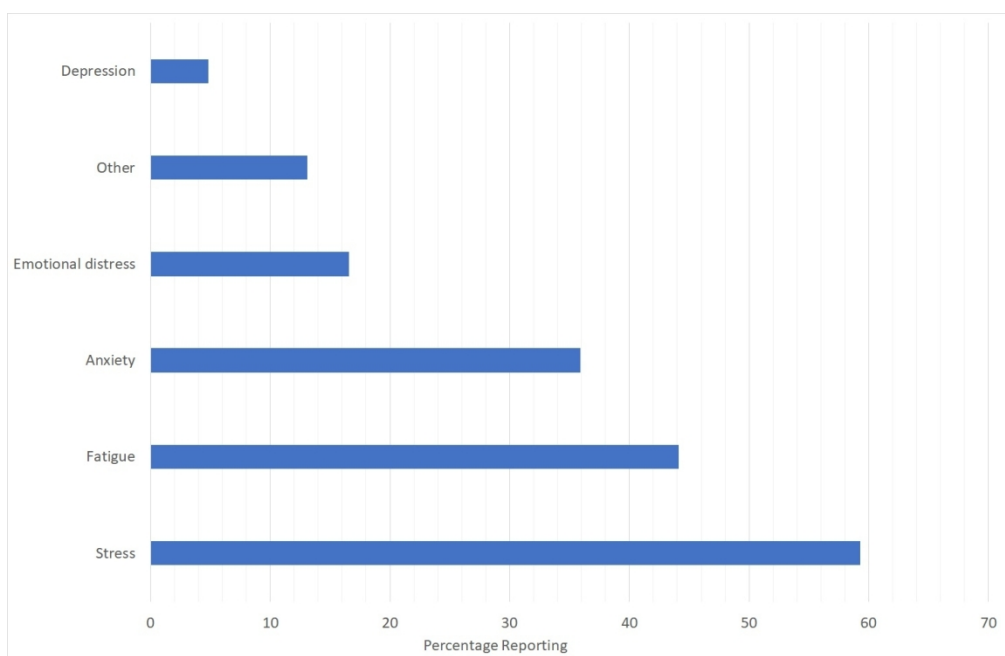

258x168mm (144 x 144 DPI)

STROBE Statement—Checklist of items that should be included in reports of *cross-sectional studies*

|                              | Item No | Recommendation                                                                                                                                                                                    | Page No                |
|------------------------------|---------|---------------------------------------------------------------------------------------------------------------------------------------------------------------------------------------------------|------------------------|
| <b>Title and abstract</b>    | 1       | (a) Indicate the study's design with a commonly used term in the title or the abstract                                                                                                            | 1                      |
|                              |         | (b) Provide in the abstract an informative and balanced summary of what was done and what was found                                                                                               | 2                      |
| <b>Introduction</b>          |         |                                                                                                                                                                                                   |                        |
| Background/rationale         | 2       | Explain the scientific background and rationale for the investigation being reported                                                                                                              | 4-5                    |
| Objectives                   | 3       | State specific objectives, including any prespecified hypotheses                                                                                                                                  | 2, 5                   |
| <b>Methods</b>               |         |                                                                                                                                                                                                   |                        |
| Study design                 | 4       | Present key elements of study design early in the paper                                                                                                                                           | 5                      |
| Setting                      | 5       | Describe the setting, locations, and relevant dates, including periods of recruitment, exposure, follow-up, and data collection                                                                   | 5                      |
| Participants                 | 6       | (a) Give the eligibility criteria, and the sources and methods of selection of participants                                                                                                       | 5-6                    |
| Variables                    | 7       | Clearly define all outcomes, exposures, predictors, potential confounders, and effect modifiers. Give diagnostic criteria, if applicable                                                          | SAP <sup>1</sup>       |
| Data sources/<br>measurement | 8*      | For each variable of interest, give sources of data and details of methods of assessment (measurement). Describe comparability of assessment methods if there is more than one group              | 5,<br>SAP <sup>1</sup> |
| Bias                         | 9       | Describe any efforts to address potential sources of bias                                                                                                                                         | 16                     |
| Study size                   | 10      | Explain how the study size was arrived at                                                                                                                                                         | 5                      |
| Quantitative variables       | 11      | Explain how quantitative variables were handled in the analyses. If applicable, describe which groupings were chosen and why                                                                      | 6,<br>SAP <sup>1</sup> |
| Statistical methods          | 12      | (a) Describe all statistical methods, including those used to control for confounding                                                                                                             | SAP <sup>1</sup>       |
|                              |         | (b) Describe any methods used to examine subgroups and interactions                                                                                                                               | SAP <sup>1</sup>       |
|                              |         | (c) Explain how missing data were addressed                                                                                                                                                       | SAP <sup>1</sup>       |
|                              |         | (d) If applicable, describe analytical methods taking account of sampling strategy                                                                                                                | NA                     |
|                              |         | (e) Describe any sensitivity analyses                                                                                                                                                             | NA                     |
| <b>Results</b>               |         |                                                                                                                                                                                                   |                        |
| Participants                 | 13*     | (a) Report numbers of individuals at each stage of study—eg numbers potentially eligible, examined for eligibility, confirmed eligible, included in the study, completing follow-up, and analysed | 6                      |
|                              |         | (b) Give reasons for non-participation at each stage                                                                                                                                              | NA                     |
|                              |         | (c) Consider use of a flow diagram                                                                                                                                                                | NA                     |
| Descriptive data             | 14*     | (a) Give characteristics of study participants (eg demographic, clinical, social) and information on exposures and potential confounders                                                          | 6-7                    |
|                              |         | (b) Indicate number of participants with missing data for each variable of interest                                                                                                               | NA                     |
| Outcome data                 | 15*     | Report numbers of outcome events or summary measures                                                                                                                                              | NA                     |

<sup>1</sup> Available at <https://osf.io/2bufh>

1  
2  
3  
4  
5  
6  
7  
8  
9  
10  
11  
12  
13  
14  
15  
16  
17  
18  
19  
20  
21  
22  
23  
24  
25  
26  
27  
28  
29  
30  
31  
32  
33  
34  
35  
36  
37  
38  
39  
40  
41  
42  
43  
44  
45  
46  
47  
48  
49  
50  
51  
52  
53  
54  
55  
56  
57  
58  
59  
60

|                          |    |                                                                                                                                                                                                              |       |
|--------------------------|----|--------------------------------------------------------------------------------------------------------------------------------------------------------------------------------------------------------------|-------|
| Main results             | 16 | (a) Give unadjusted estimates and, if applicable, confounder-adjusted estimates and their precision (eg, 95% confidence interval). Make clear which confounders were adjusted for and why they were included | 6-14  |
|                          |    | (b) Report category boundaries when continuous variables were categorized                                                                                                                                    | NA    |
|                          |    | (c) If relevant, consider translating estimates of relative risk into absolute risk for a meaningful time period                                                                                             | NA    |
| Other analyses           | 17 | Report other analyses done—eg analyses of subgroups and interactions, and sensitivity analyses                                                                                                               | NA    |
| <b>Discussion</b>        |    |                                                                                                                                                                                                              |       |
| Key results              | 18 | Summarise key results with reference to study objectives                                                                                                                                                     | 14-16 |
| Limitations              | 19 | Discuss limitations of the study, taking into account sources of potential bias or imprecision. Discuss both direction and magnitude of any potential bias                                                   | 16    |
| Interpretation           | 20 | Give a cautious overall interpretation of results considering objectives, limitations, multiplicity of analyses, results from similar studies, and other relevant evidence                                   | 14-16 |
| Generalisability         | 21 | Discuss the generalisability (external validity) of the study results                                                                                                                                        | 14-16 |
| <b>Other information</b> |    |                                                                                                                                                                                                              |       |
| Funding                  | 22 | Give the source of funding and the role of the funders for the present study and, if applicable, for the original study on which the present article is based                                                | 19    |

\*Give information separately for exposed and unexposed groups.

**Note:** An Explanation and Elaboration article discusses each checklist item and gives methodological background and published examples of transparent reporting. The STROBE checklist is best used in conjunction with this article (freely available on the Web sites of PLoS Medicine at <http://www.plosmedicine.org/>, Annals of Internal Medicine at <http://www.annals.org/>, and Epidemiology at <http://www.epidem.com/>). Information on the STROBE Initiative is available at [www.strobe-statement.org](http://www.strobe-statement.org).

# BMJ Open

## A cross-sectional survey of sexual health professionals' experiences and perceptions of the 2022 mpox outbreak in the United Kingdom

|                                 |                                                                                                                                                                                                                                                                                                                                                                                                                                                                                                                                                                                                                                                                                                                                                                                                                                                                                                                                                                                                                                                                                                                                                                                                              |
|---------------------------------|--------------------------------------------------------------------------------------------------------------------------------------------------------------------------------------------------------------------------------------------------------------------------------------------------------------------------------------------------------------------------------------------------------------------------------------------------------------------------------------------------------------------------------------------------------------------------------------------------------------------------------------------------------------------------------------------------------------------------------------------------------------------------------------------------------------------------------------------------------------------------------------------------------------------------------------------------------------------------------------------------------------------------------------------------------------------------------------------------------------------------------------------------------------------------------------------------------------|
| Journal:                        | <i>BMJ Open</i>                                                                                                                                                                                                                                                                                                                                                                                                                                                                                                                                                                                                                                                                                                                                                                                                                                                                                                                                                                                                                                                                                                                                                                                              |
| Manuscript ID                   | bmjopen-2023-080250.R1                                                                                                                                                                                                                                                                                                                                                                                                                                                                                                                                                                                                                                                                                                                                                                                                                                                                                                                                                                                                                                                                                                                                                                                       |
| Article Type:                   | Original research                                                                                                                                                                                                                                                                                                                                                                                                                                                                                                                                                                                                                                                                                                                                                                                                                                                                                                                                                                                                                                                                                                                                                                                            |
| Date Submitted by the Author:   | 06-Dec-2023                                                                                                                                                                                                                                                                                                                                                                                                                                                                                                                                                                                                                                                                                                                                                                                                                                                                                                                                                                                                                                                                                                                                                                                                  |
| Complete List of Authors:       | Hayes, Rosalie; Queen Mary University of London, SHARE Collaborative, Wolfson Institute of Population Health<br>Dakin, Francesca; University of Oxford, Nuffield Department of Primary Care Health Sciences<br>Smuk, Melanie; Queen Mary University of London, SHARE Collaborative, Blizard Institute<br>Paparini, Sara; Queen Mary University of London, SHARE Collaborative, Wolfson Institute of Population Health<br>Apea, Vanessa; Queen Mary University of London, SHARE Collaborative, Wolfson Institute of Population Health; Barts Health NHS Trust, Department of Infection and Immunity<br>Dewsnap, Claire; Sheffield Teaching Hospitals NHS Foundation Trust, Sexual Health; The University of Sheffield<br>Waters, L.; Central and North West London NHS Foundation Trust, Mortimer Market Centre; University College London, Institute for Global Health<br>Anderson, Jane ; Queen Mary University of London, SHARE Collaborative, Wolfson Institute of Population Health; Barts Health NHS Trust, Department of Infection and Immunity<br>Orkin, Chloe; Queen Mary University of London, SHARE Collaborative, Blizard Institute; Barts Health NHS Trust, Department of Infection and Immunity |
| <b>Primary Subject Heading</b>: | Sexual health                                                                                                                                                                                                                                                                                                                                                                                                                                                                                                                                                                                                                                                                                                                                                                                                                                                                                                                                                                                                                                                                                                                                                                                                |
| Secondary Subject Heading:      | Health services research                                                                                                                                                                                                                                                                                                                                                                                                                                                                                                                                                                                                                                                                                                                                                                                                                                                                                                                                                                                                                                                                                                                                                                                     |
| Keywords:                       | Public health < INFECTIOUS DISEASES, Health Workforce, Health policy < HEALTH SERVICES ADMINISTRATION & MANAGEMENT, SEXUAL MEDICINE, Cross-Sectional Studies                                                                                                                                                                                                                                                                                                                                                                                                                                                                                                                                                                                                                                                                                                                                                                                                                                                                                                                                                                                                                                                 |
|                                 |                                                                                                                                                                                                                                                                                                                                                                                                                                                                                                                                                                                                                                                                                                                                                                                                                                                                                                                                                                                                                                                                                                                                                                                                              |

SCHOLARONE™  
Manuscripts





I, the Submitting Author has the right to grant and does grant on behalf of all authors of the Work (as defined in the below author licence), an exclusive licence and/or a non-exclusive licence for contributions from authors who are: i) UK Crown employees; ii) where BMJ has agreed a CC-BY licence shall apply, and/or iii) in accordance with the terms applicable for US Federal Government officers or employees acting as part of their official duties; on a worldwide, perpetual, irrevocable, royalty-free basis to BMJ Publishing Group Ltd ("BMJ") its licensees and where the relevant Journal is co-owned by BMJ to the co-owners of the Journal, to publish the Work in this journal and any other BMJ products and to exploit all rights, as set out in our [licence](#).

The Submitting Author accepts and understands that any supply made under these terms is made by BMJ to the Submitting Author unless you are acting as an employee on behalf of your employer or a postgraduate student of an affiliated institution which is paying any applicable article publishing charge ("APC") for Open Access articles. Where the Submitting Author wishes to make the Work available on an Open Access basis (and intends to pay the relevant APC), the terms of reuse of such Open Access shall be governed by a Creative Commons licence – details of these licences and which [Creative Commons](#) licence will apply to this Work are set out in our licence referred to above.

Other than as permitted in any relevant BMJ Author's Self Archiving Policies, I confirm this Work has not been accepted for publication elsewhere, is not being considered for publication elsewhere and does not duplicate material already published. I confirm all authors consent to publication of this Work and authorise the granting of this licence.

## Title

A cross-sectional survey of sexual health professionals' experiences and perceptions of the 2022 mpox outbreak in the United Kingdom

## Authors

Rosalie Hayes<sup>1</sup>, Francesca Dakin<sup>2</sup>, Melanie Smuk<sup>3</sup>, Sara Papparini<sup>1</sup>, Vanessa Apea<sup>1,4</sup>, Claire Dewsnap<sup>5,6</sup>, Laura Waters<sup>7,8</sup>, Jane Anderson<sup>1,4</sup>, Chloe Orkin<sup>3,4</sup>

1 SHARE collaborative, Wolfson Institute of Population Health, Queen Mary University of London, London, UK.

2 Nuffield Department of Primary Care Sciences, University of Oxford, Oxford, UK

3 SHARE Collaborative, Blizard Institute, Queen Mary University of London, London, UK.

4 Department of Infection and Immunity, Barts Health NHS Trust, London, UK.

5 Sexual Health, Sheffield Teaching Hospital NHS Foundation Trust, Sheffield, UK.

6 The University of Sheffield, Sheffield, UK

7 Mortimer Market Center, Central and North West London NHS Foundation Trust, London, UK.

8 Institute for Global Health, University College London, London, UK.

## Corresponding author

Chloe Orkin, Centre for Immunology, Queen Mary University of London Barts and The London School of Medicine and Dentistry, London, E1 2AD, UK; [c.m.orkin@qmul.ac.uk](mailto:c.m.orkin@qmul.ac.uk)

## Abstract

**Objective:** To understand the experiences and perceptions of sexual health professionals responding to the May 2022 mpox outbreak in the United Kingdom (UK).

**Design:** Cross-sectional, anonymous, online survey collecting quantitative and qualitative data. Convenience sample recruited via an international network of sexual health and HIV clinicians responding to mpox and promoted through clinical associations and social media. Survey domains included clinical workload; preparedness, support, and training; safety at work; vaccination; and wellbeing. Qualitative descriptive analysis of open text responses was conducted to support interpretation of the quantitative data.

**Participants:** Participants who were employed as sexual health professionals in the UK and had direct clinical experience of mpox were included in the analysis. The survey was completed between 11 August and 31 October 2022 by 139 respondents, the majority of whom were doctors (72.7%), cis-female (70.5%) and White (78.4%).

**Results:** 70.3% reported that they were required to respond to mpox in addition to their existing clinical responsibilities, with 46.8% working longer hours as a result. In the free-text data, respondents highlighted that workload pressures were exacerbated by a lack of additional funding for mpox, pre-existing pressures on sexual health services, and unrealistic expectations around capacity. 67.6% of respondents reported experiencing negative emotional impact due to their mpox work, with stress (59.0%), fatigue (43.2%) and anxiety (36.0%) being the most common symptoms. 35.8% stated that they were less likely to remain in their profession because of their experiences during the mpox outbreak. In the free-text data, these feelings were ascribed to post-COVID exhaustion, understaffing, and frustration among some participants at the handling of the mpox response.

**Conclusions:** These findings indicate that sexual health services require increased funding and resources, along with evidence-based wellbeing interventions, to support sexual health professionals' outbreak preparedness and recovery.

## Strengths and Limitations

### *Strengths*

- This study is one of the first to explore the experiences of sexual health professionals responding to mpox in the UK, with data collected during the height of the outbreak.
- The collection of qualitative data via open-text questions helped to contextualise quantitative findings and centre sexual health professionals' experiences and voices within the study.

### *Limitations*

- The convenience sampling strategy means the respondents and perspectives presented in this study may not be representative of the wider UK sexual and reproductive health workforce.
- The exploratory nature of the study constrained statistical analysis, as it was underpowered to explore associations between variables.

## Main text

### BACKGROUND

There is increasing awareness of the pressures that pandemics and their system-wide management place on healthcare professionals' physical, mental, and emotional health (1). The arrival of SARS-Cov-2 exposed multiple threats to healthcare professional wellbeing including fear of contagion (and subsequent transmission to others), exacerbated by a lack of adequate PPE, inadequate and rapidly changing guidance and training, and inconsistent information (2–4). Staff also faced higher workloads, disruptions to daily routines and team dynamics, negative impacts on personal and professional identity, and threats to psychological safety (2,5). Outside of work, healthcare professionals also experienced stigma in the community (related to fear of contagion) and disruptions to family relationships (2,4).

May 2022 marked the beginning of what became the largest and geographically most widespread mpox (formerly monkeypox) outbreak to be reported outside the principal historically affected countries in western and central Africa. Within 3 months the outbreak was declared a Public Health Emergency of International Concern by the World Health Organization (6), coinciding with a time when health systems were already significantly overstretched by the ongoing COVID-19 pandemic (7).

Known risk factors for acquiring mpox include contact with fomites, bodily fluids, and airborne droplets (8–10), and the most evidenced and protective non-behavioural intervention is the smallpox vaccine (11,12). The latest outbreak, however, differed from previous outbreaks and presented new challenges. First, the timing of the outbreak coincided with the lifting of travel and other restrictions associated with the COVID-19 pandemic, with early cases linked to the re-commencing of large events, parties and increases in close social and sexual contact (13). Secondly, unlike previous outbreaks of mpox, transmission has been associated with sexual networks of gay or bisexual men and other men who have sex with men. Thirdly, clinical presentation has changed and now frequently includes anogenital lesions (14). These combined factors have put sexual health professionals on the frontline of the response.

Between 6 May 2022 to 30 September 2023, there were 3732 cases of mpox in the UK, with 95% of these cases confirmed in England (15). At the peak of the outbreak, in July 2022, UK

1  
2  
3 sexual health services were dealing with 350 cases of mpox every week (15). The  
4 unanticipated pressure of mpox was layered upon an already overstretched and depleted  
5 sexual and reproductive health workforce. In addition to COVID-19-associated disruption and  
6 burnout, sexual and reproductive health services were dealing with an ongoing crisis in  
7 recruitment and retention of staff (16–18) coupled with reduced funding and rising demand  
8 for services (19). Unlike most clinical services, sexual health services in England are funded  
9 from highly constrained local authority public health budgets rather than from central health  
10 system's funds in the National Health Service (NHS). As well as risking increased transmission  
11 of mpox, clinical leaders noted that unexpected and unfunded mpox clinical activity was  
12 competing with and displacing core sexual and reproductive health services, threatening the  
13 sustainability of services and public health (20).

24 Given this context, mpox likely placed a significant burden on sexual health professionals.  
25 However, beyond data on exposure risks of mpox in health care settings (21,22), little is  
26 known so far about the wider experience and impact of the outbreak on sexual health  
27 professionals. We sought to address this gap by conducting a rapid appraisal of the  
28 experiences and perceptions of UK sexual health professionals involved in the response to the  
29 2022 multi-country mpox outbreak.

## 38 METHODS

40 Between 11 August and 31 October 2022, a cross-sectional, anonymous, online survey was  
41 conducted with international healthcare professionals involved in the multi-country  
42 outbreak of mpox. The questionnaire (available at <https://osf.io/dmu65>) was developed  
43 using literature related to healthcare worker experience of infectious disease outbreaks (2–  
44 5) and the clinical expertise within the authorship team [VA, CD, LW, JA, CO]. It was also  
45 reviewed by clinical colleagues in several countries within SHARE-Net (23), an informal  
46 network of researchers and clinicians responding to mpox from around the world,  
47 established at the beginning of the multi-country outbreak in May. The survey contained 87  
48 new (non-validated) questions, assessing: clinical workload; preparedness, support and  
49 training; safety at work; mpox vaccination; wellbeing; and mpox research. Both closed  
50 (single- and multi-response questions) and open-text questions were used, as well as  
51  
52  
53  
54  
55  
56  
57  
58  
59  
60

1  
2  
3 questions regarding demographic characteristics (e.g., age, gender identity, sexual  
4 orientation, and ethnicity). The survey was constructed using SmartSurvey software  
5 (SmartSurvey Ltd, Tewkesbury, UK) (24) and disseminated in English, Spanish, French and  
6 Portuguese.  
7  
8  
9

10  
11 International survey dissemination was via SHARE-Net, as well as via newsletters and social  
12 media channels of the British Association for Sexual Health (BASHH), the British HIV  
13 Association (BHIVA), European AIDS Clinical Society (EACS) and International AIDS Society  
14 (IAS).  
15  
16  
17

18  
19 The analysis for this paper was restricted to respondents who reported working in sexual  
20 health in the UK, as this allowed for greater exploration of country- and context-specific  
21 factors influencing healthcare professionals' experiences. A manuscript analysing responses  
22 from the entire international sample is forthcoming.  
23  
24  
25

26  
27 Quantitative data analysis was undertaken by MS using Stata 17 (StataCorp LLC, College  
28 Station, TX, USA) (25) following a prespecified statistical analysis plan (available at  
29 <https://osf.io/2bufh>). All authors provided iterative feedback. Denominators (n) are shown in  
30 the text when missing responses occurred.  
31  
32  
33

34  
35 The qualitative data collected expanded in open text boxes on specific questions (e.g., "How  
36 satisfied were you with the support your clinic/service received from your national public  
37 health agency? Why/why not?"). Qualitative data were analysed using descriptive qualitative  
38 analysis (26) in NVivo v1.7 (Lumivero, Burlington, MA, USA) as a pragmatic approach to  
39 handling large numbers of entries of short textual data. Free-text data was deductively  
40 organised by the question's survey domain, then RH inductively generated the coding  
41 categories and brief findings within these domains, with iterative feedback from remaining  
42 authors. Respondent quotations are provided in each section to provide context to the  
43 statistical findings.  
44  
45  
46  
47  
48  
49  
50

51  
52 The study received ethical approval from the Queen Mary University of London Ethics of  
53 Research Committee (QMERC22.297) and online informed consent was obtained from all  
54 respondents at the beginning of the questionnaire.  
55  
56  
57  
58  
59  
60

## Patient and public involvement

No patient and public involvement was conducted as part of this study as the research was focused on the experiences of healthcare professionals. However, our research team includes sexual health and HIV clinicians with firsthand experience of caring for patients with mpox during the 2022 outbreak [VA, CD, LW and CO]. We conducted a separate project to understand the experiences of communities affected by mpox which was co-produced with two community-based organisations involved in sexual health promotion and advocacy (27).

## RESULTS

### Participant characteristics

A total of 139 UK respondents completed the survey; their demographics are presented in Table 1. Most were doctors (73.8%) or nurses (24.8%). All respondents had been involved clinically (i.e. diagnosing and treating) with people with mpox. The main sites of care for patients with mpox were sexual health clinics (92.8%), specialist HIV clinics (22.3%), in-patient wards (9.4%), and emergency departments (5.8%). Most respondents identified as cis-female (70.5%). 13.0% of respondents identified as a gay or bisexual man. The majority of the sample identified as White (78.4%).

**Table 1. Survey respondent characteristics (n=139)**

| Category                                         | n   | %    |
|--------------------------------------------------|-----|------|
| <b>Age</b>                                       |     |      |
| 18-25                                            | 1   | 0.7  |
| 26-30                                            | 12  | 8.6  |
| 31-34                                            | 13  | 9.4  |
| 35-40                                            | 19  | 13.7 |
| 41-50                                            | 47  | 33.8 |
| 51-60                                            | 38  | 27.3 |
| 60+                                              | 9   | 6.5  |
| <b>Gender</b>                                    |     |      |
| Cis-Female                                       | 98  | 70.5 |
| Cis-Male                                         | 35  | 26.2 |
| Trans-Male                                       | 1   | 0.7  |
| Non-binary                                       | 2   | 1.4  |
| Prefer not to say                                | 3   | 2.2  |
| <b>Do you identify as a gay or bisexual man?</b> |     |      |
| Yes                                              | 18  | 13.0 |
| No                                               | 118 | 84.9 |



|                                                                               |     |      |
|-------------------------------------------------------------------------------|-----|------|
| Prefer not to say                                                             | 3   | 2.2  |
| <b>Ethnicity</b>                                                              |     |      |
| White                                                                         | 109 | 78.4 |
| Black                                                                         | 3   | 2.2  |
| Asian                                                                         | 13  | 9.4  |
| Latino / Latinx                                                               | 1   | 0.7  |
| Arab                                                                          | 1   | 0.7  |
| Mixed or multiple ethnic groups                                               | 10  | 7.2  |
| Other                                                                         | 2   | 1.4  |
| <b>Professional role</b>                                                      |     |      |
| Doctor                                                                        | 101 | 72.7 |
| Nurse                                                                         | 36  | 25.9 |
| Health Promotion Worker                                                       | 2   | 1.4  |
| <b>Where did you see suspected or confirmed clinical cases of monkeypox?*</b> |     |      |
| Sexual health clinic (community, public, private)                             | 129 | 92.8 |
| Infectious disease clinic                                                     | 2   | 1.4  |
| Emergency department                                                          | 8   | 5.8  |
| HIV clinic                                                                    | 31  | 22.3 |
| Dermatology clinic                                                            | 1   | 0.7  |
| General practice                                                              | 1   | 0.7  |
| In-patient ward                                                               | 13  | 9.4  |

\* Participants could select multiple options.

### Clinical workload

During the first four weeks of the UK mpox outbreak, over one third of respondents (33.8%) reported that at least quarter of their working time was taken up with mpox and 19.4% reported that more than half of their time was mpox-focused. The majority (0.3%) reported that their other existing clinical responsibilities had not been removed to allow them to focus on mpox-related work, with nearly half (46.8%) working longer hours as a result of mpox.

Respondents carried out a range of tasks as part of their mpox-related clinical work, most commonly direct patient care (97.1%), contacting mpox patients or their contacts (73.4%), and developing local protocols and operational guidance (59.0%).

Four themes were identified in the open-text data in relation to mpox-related workload: a lack of additional funding or resources, existing pressures on services, unrealistic expectations around capacity to respond to mpox, and implications for other sexual health services.

Many respondents noted that the increased workload associated with mpox was not matched by additional funding, with some describing a sense that mpox was being 'dumped'

1  
2  
3 on sexual health services. Respondents had to work additional hours as a result and felt  
4 there was little recognition for this (including no paid overtime).  
5  
6

7 *“Expected to do a lot at speed with no additional support or resource.”*  
8  
9

10 *Respondent 12 – Doctor, cis-female, Mixed or Multiple Ethnic Group, aged 35-40.*  
11

12 Others highlighted that understaffing due to COVID-19, along with previous budgetary cuts,  
13 meant that these additional responsibilities were being assigned to services already under  
14 extreme pressure.  
15  
16

17  
18 *“I think even before covid the pressure within sexual health was such that it felt like you had  
19 to rush through patients and didn't have the time to give the care that was needed”*  
20  
21

22  
23 *Respondent 10 – Nurse, cis-female, White, aged 35-40.*  
24

25 Reporting requirements to the national public health agency, the UK Health Security Agency  
26 (UKHSA), added significant pressure. Some respondents felt that UKSHA's expectations of  
27 how sexual health services should respond to the outbreak were unrealistic.  
28  
29

30  
31 *“There was a significant mismatch between the resources we had and the resources we were  
32 expected to devote to the UKHSA processes (reporting cases, reporting on case  
33 management, patient follow-ups, attendance at meetings, infection control)”*  
34  
35  
36

37  
38 *Respondent 78 – Doctor, cis-male, White, aged 41-50.*  
39

40 Respondents attributed this to a lack of understanding about the reality of sexual health  
41 services such as staffing levels, the logistics of applying guidance designed for highly  
42 controlled in-patient settings to open-access clinics, and having the infrastructure in place  
43 for services such as 24-hour on call rota. Several respondents were concerned about the  
44 impact on other sexual health services.  
45  
46  
47  
48

49  
50 *“We have had acutely unwell patients EG: Herpes, PID [Pelvic Inflammatory Disease] care  
51 unacceptably delayed by the need to phone triage and prioritise monkeypox testing.”*  
52  
53

54 *Respondent 25 – Doctor, cis-female, White, aged 51-60.*  
55  
56  
57  
58  
59  
60

### Preparedness, support, and training

When asked how personally prepared they were for the mpox outbreak, more than three-quarters (81.3%) of respondents said they were not at all or only slightly prepared. Over half (52.5%) of respondents had never heard of mpox prior to the outbreak. Respondents expressed a marked lack of confidence about their ability to care for people with mpox. Over half (56.8%) of respondents described themselves as not at all confident in managing suspected or confirmed mpox cases at the start of the outbreak, with 31.7% suggesting they had initially misdiagnosed a mpox-related rash.

However, 78.4% had received education, training, or instruction about mpox specifically. Most commonly this was in the form of written guidance (60.4%), in-house practice education (54.7%), practical PPE instruction (33.1%), and lectures, webinars, or presentations (31.7%). Of those who had received mpox-related training or education and rated it (n=108), 11.1% rated this entirely adequate, 79.6% rated it fairly or mostly adequate, and 9.3% rated it only slightly or not at all adequate. Less than one third (27.3%) of respondents had completed any type of general infectious disease outbreak management education and training.

Nearly two-thirds (62.6%) of respondents agreed or strongly agreed that their employing institution had provided clear, timely and authoritative information about mpox. When asked how satisfied they were with the support their clinic or service received from the national public health agency (n=136), 61.8% said they were fairly, mostly or extremely satisfied, and 38.2% said they were only slightly or not at all satisfied.

In the open text data, those who were satisfied with the response were understanding that the novelty of the outbreak meant that the public health agency initially lacked information about how best to respond, and guidance changed as understanding increased. Others said they felt the public health agency worked well with professional clinical bodies, and that the information and training provided was excellent.

1  
2  
3  
4  
5  
6  
7  
8  
9  
10  
11  
12  
13  
14  
15  
16  
17  
18  
19  
20  
21  
22  
23  
24  
25  
26  
27  
28  
29  
30  
31  
32  
33  
34  
35  
36  
37  
38  
39  
40  
41  
42  
43  
44  
45  
46  
47  
48  
49  
50  
51  
52  
53  
54  
55  
56  
57  
58  
59  
60

*“UKHSA's knowledge of the infection (which was unavoidably not based on any previous outbreak as sexually transmitted epidemics of mpox are unprecedented in the UK) was made available very early on too via BASHH.”*

*Respondent 78 – Doctor, cis-male, White, aged 41-50.*

However, some respondents described a lack of strategic leadership which impeded an effective response to mpox. Several respondents described developing their own guidelines and procedures, and felt they were left to make decisions with little external support. Some respondents expressed surprise that so little of the learning from managing COVID-19 was being applied to the mpox outbreak.

*“Each clinic was constantly reinventing the wheel by developing local protocols for MPXV [mpox] patient management, PGD for vaccinations, vaccination procuring and delivery. This should all have been managed centrally. Nothing learned from the COVID pandemic has been translated to managing the MPXV response.”*

*Respondent 101 – Doctor, cis-male, gay/bi man, White, aged 41-50.*

Respondents described how the absence of strategic leadership they identified led to poor communication, with clinicians learning about policy changes through the media or from patients and frequent changes in guidance. Some respondents felt that the mixed messaging (particularly in relation to vaccine supply) contributed to patients' frustration, of which frontline clinicians bore the brunt. They felt the realities of sexual health clinical care were poorly understood.

*“Poorly thought out, unhelpful, and mixed messaging from UKHSA. Unable to tell the truth to patients about vaccine supply leading to huge increase in abuse and aggression for frontline staff. Multiple meetings with multiple different groups – none of whom were talking to each other and many of whom had no idea how a sexual health clinic operated.”*

*Respondent 35 – Doctor, cis-female, White, aged 41-50.*

## **Safety at work**

The majority (n=85.5%, n=138) of respondents reported that their clinic or service had performed a risk assessment to ensure staff safety when dealing with people with suspected or confirmed mpox. 93.5% rated the mpox infection control precautions in their clinic or

1  
2  
3 service as fairly, mostly, or entirely adequate. One respondent reported acquiring mpox,  
4 although it is unclear whether the exposure was occupational. Three respondents (2.2%)  
5 reported that colleagues had acquired mpox and no respondents reported family members  
6 acquiring mpox.  
7  
8  
9

10  
11 In the open text data, some respondents expressed concerns about their safety at work, in  
12 particular those who felt especially at risk from complications from a potential infection, such  
13 as pregnancy, long-COVID, or planned surgery. Some reported feeling that their concerns  
14 were not adequately addressed by their employer.  
15  
16  
17

18  
19 *I didn't receive a risk assessment at all, just told 'to stay away from Monkeypox', yet I was*  
20 *around potential Monkeypox patients in the waiting room, in clinic and around colleagues*  
21 *seeing patients and diagnosing Monkeypox. Especially inadequate as I couldn't get*  
22 *vaccinated.*  
23  
24  
25

26  
27 *Respondent 76 – Doctor, cis-female, White, aged 31-34.*  
28  
29

30 In contrast, some respondents felt that infection control procedures were prioritised over  
31 patient dignity, resulting in care provision perceived to be stigmatising to patients. The  
32 downgrading of mpox from a high-consequence infectious disease (HCID) classification was  
33 perceived by some respondents to have taken too long, contributing to a sense that infection  
34 control requirements were excessive and potentially stigmatising given the perceived level of  
35 risk.  
36  
37  
38  
39

## 40 41 **Vaccination**

42  
43 Less than a quarter (21.7%) of respondents (n=138) had received smallpox vaccination prior  
44 to the 2022 mpox outbreak in the UK. By the time of the survey, 69.1% had been offered  
45 vaccination against mpox, of whom 70.1% had received the vaccine. However, of those  
46 vaccinated (n=83), 34.9% felt they had not received the vaccine in a timely and equitable  
47 manner. Overall, 55.8% of respondents (n=138) considered mpox vaccination access in the  
48 UK to be not at all adequate, with the key focus being on access for patients. The term  
49 “chaotic” was used by several to describe vaccine delivery to patients, and some respondents  
50 felt they were made to provide misleading information to patients about vaccine availability.  
51 Several respondents described how the inadequate vaccine supply and poor communication  
52 around this meant that delivery was inequitable in its impact on marginalised patients.  
53  
54  
55  
56  
57  
58  
59  
60

1  
2  
3  
4  
5  
6  
7  
8  
9  
10  
11  
12  
13  
14  
15  
16  
17  
18  
19  
20  
21  
22  
23  
24  
25  
26  
27  
28  
29  
30  
31  
32  
33  
34  
35  
36  
37  
38  
39  
40  
41  
42  
43  
44  
45  
46  
47  
48  
49  
50  
51  
52  
53  
54  
55  
56  
57  
58  
59  
60

*“Not fair that we can't vaccinate everyone in need and that outside London coverage has been terrible. Also, that there's been no decent public messaging, and everything's had to be spread through word of mouth. Disadvantages the un-connected gays.”*

*Respondent 88 – Doctor, non-binary, White, aged 31-34.*

## Wellbeing

Ninety-four respondents (67.6%) reported experiencing some form of negative emotional impact due to their mpox work, with 50.4% reporting multiple symptoms. The most commonly reported symptoms were stress (59.0%), fatigue (43.2%) and anxiety (36.0%). Stress, fatigue and anxiety were also the most common symptoms experienced by respondents prior to their work on mpox, but at lower rates (38.1%, 30.9%, 20.1%, respectively).

A substantial proportion of respondents reported feeling some level of burnout, either as a result of responding to mpox and COVID-19, or even prior to these outbreaks. 10.8% of all respondents reported feeling considerably or completely burnt out due to their work on mpox, while 54.0% reported feeling slight or moderate feelings of burnout, and 35.3% reported feeling not at all burnt out. Of the 77 (55.4%) respondents who had provided care to COVID-19 patients in the preceding two years, 13.0% reported feeling considerably or completely burnt out prior to the COVID-19 pandemic, 55.8% reported feeling slight or moderate feelings of burnout, and 31.2% reported feeling not at all burnt out.

When asked whether the experience of mpox in addition to the COVID-19 pandemic made them more or less likely to remain in health as a profession, 35.8% stated that they were less likely to remain, only 4.4% stated they were more likely to remain, and the remainder (~60%) reported no change.

Many respondents ascribed these feelings to exhaustion from having to deal with another outbreak so soon after COVID-19. Some respondents felt that there was a lack of acknowledgement or consideration for the pressure that staff were already under prior to the mpox outbreak.

*This work coincided with increasing service pressures, and without a resolution of the Covid pandemic (still very stressful to staff). We have had to adapt and shift other clinical tasks,*

1  
2  
3 *redesign clinics and services without necessarily acknowledging the amount of low staff*  
4  
5 *morale and distress we have all been through.*

6  
7  
8 *Participant 50 – Doctor, cis-male, White, aged 51-60.*  
9

10 Some respondents described how understaffing meant they did not always feel they could  
11 deliver adequate care, which exacerbated their stress. In addition, some felt the way in which  
12 the mpox response was handled contributed to the distress and anger of patients.  
13  
14

15  
16 *Listening to the very distressing accounts from the MPX [mpox] patients especially those*  
17 *who are frightened & isolating alone and not being able help or support them better.*  
18

19  
20  
21 *Participant 8 – Doctor, cis-female, White, aged 51-60.*  
22

23 A few respondents expressed anger at patients who they felt did not take the outbreak  
24 seriously or lacked empathy for the situation clinicians also found themselves in.  
25  
26

## 27 **DISCUSSION**

28  
29 Our study, undertaken at the intersection of two major infectious disease outbreaks in the  
30 UK in 2022 gives important insights into the challenges that pandemics pose to health  
31 professionals. It is one of the first studies to explore the experiences of sexual health  
32 professionals responding to mpox in the UK, with data collected at the height of the  
33 outbreak. Through the combination of quantitative and qualitative data, our findings paint a  
34 picture of an understaffed, under-resourced and underprepared workforce with little  
35 resilience to adapt to the challenges of a novel outbreak soon after a recent pandemic. Staff  
36 wellbeing has suffered, with high levels of stress and burnout contributing to staff reporting  
37 that they are more likely to leave their profession.  
38  
39

40  
41 The experiences of respondents in our study reinforce the view that mpox landed on  
42 services that were already under huge financial and workforce pressure. Previous studies  
43 have identified that inadequate funding and resources for the mpox response has had  
44 implications for routine sexual health care – risking efforts to tackle the competing public  
45 health threats of HIV and increasing STI rates. A service evaluation of a UK clinic described  
46 the temporary cancellation of routine sexual health services, such as warts clinics and  
47 vaccinations, in response to the increased workload brought about by the mpox outbreak  
48 (28). Similarly, a US study reported a significant decline in HIV PrEP enrolment and STI  
49  
50  
51  
52  
53  
54  
55  
56  
57  
58  
59  
60

1  
2  
3 testing when STI care was deprioritised by a need to upscale mpox vaccination with limited  
4 staff resource (29). HIV testing rates among certain population groups such as heterosexual  
5 men and heterosexual and bisexual women are yet to return to the levels they were prior to  
6 the COVID-19 pandemic (30). Disruption to routine sexual health services including HIV  
7 testing threatens the UK's progress towards elimination of HIV transmission.  
8  
9

10  
11  
12  
13 In addition to concerns about their ability to deliver core sexual health services, respondents  
14 highlighted worries about their ability to ensure optimal care for people with and/or at risk  
15 of mpox. A key source of distress identified by this study was the rapidly changing and  
16 inadequate information and guidance – also highlighted as an issue by UK healthcare  
17 professionals responding to the COVID-19 pandemic (3). This does not appear to be unique  
18 to the UK, with healthcare professionals across the globe grappling with a quagmire of  
19 fluctuating (and sometimes contradictory) mpox policies and guidance during the outbreak  
20 (31), combined with the additional pressure of vaccine shortage and inequitable global  
21 provision (32). Rapidly changing guidance has knock-on effects for affected communities:  
22 our previous survey of communities at risk of mpox in the UK highlighted perceptions of  
23 poor communication by health authorities and a lack of trust in the early public health  
24 response to mpox, especially among groups who already face social and structural barriers  
25 to care (27).  
26  
27

28  
29  
30  
31 Producing reliable, coordinated, and consistent guidance is a common challenge in novel  
32 outbreaks where knowledge is evolving, and it takes time for consensus to emerge.  
33 However, while some examples of effective collaboration were highlighted in this study,  
34 concerns about a lack of strategic coordination nationally and conflicting messaging indicate  
35 that communication and coordination between key stakeholders must be improved to avoid  
36 repeating past mistakes. Lessons can be learned from other countries as well as previous  
37 epidemics – a recent policy report on the UK mpox response pointed to the United States  
38 government's national mpox response team as an example of strategic leadership “between  
39 and within organisations” (33). Encouragingly, we found high levels of acceptability of mpox  
40 vaccination among UK sexual health professionals, which contrasts with findings among  
41 healthcare professionals in other countries (34–37). Most respondents felt safe at work,  
42 with very few mpox acquisitions reported. This corresponds with the reported low number  
43 of cases of occupational transmission of mpox across Europe (38). Notably, most of the  
44  
45  
46  
47  
48  
49  
50  
51  
52  
53  
54  
55  
56  
57  
58  
59  
60



respondents to this survey encountered mpox in outpatient services, where the risk of occupational infection is expected to be lower than inpatient settings (39,40).

Finally, the high levels of stress, fatigue, and anxiety reported by sexual health professionals responding to mpox are deeply concerning. This issue is endemic in the NHS more generally, with 44.8% of NHS staff reported feeling unwell due to work-related stress in 2022 (41).

While COVID-19 undoubtedly created new pressures (42), poor mental health among healthcare professionals pre-dates the pandemic and the mpox outbreak (43). As well as being challenging for staff, this also presents economic implications for the health system (poor staff wellbeing has been estimated as costing the NHS £12.1 billion a year (44)) and implications for the quality and safety of patient care (45).

The study has limitations, and our findings should be interpreted with caution. This was an exploratory study in a new outbreak intended to provide foundational knowledge regarding the experiences of clinicians responding to a novel presentation of an unfamiliar disease. Consequently, it relied on a convenience sample and cannot be described as representative. While demographic data for the overall sexual health and HIV workforce are not available, for comparison there were estimated to be 531 consultants working in sexual health and HIV in the UK in 2022, of whom 66.0% were female, 63% were White, and the median age group was 45-49 (46) Using a single source of data (a survey), may have resulted in limited representation of sexual health professionals' views. A power calculation was not conducted and therefore statistical analysis was limited to describing results as the study was underpowered to explore associations between variables and potential differences between subgroups (e.g., based on gender, professional role, geography, race and ethnicity). Further, those who responded to the open text questions and provided lengthier responses were generally those with negative experiences of responding to the outbreak. More robust research is needed in future to explore inequities in sexual health professionals' experiences of the mpox outbreak and to identify protective factors which supported more positive experiences that can shape responses in the future.

## CONCLUSION

With future infectious disease outbreaks an inevitability, these findings indicate that greater investment and coordination is required to ensure an effective national response and limit

1  
2  
3 negative impact on healthcare professional wellbeing. Sexual health services need adequate  
4 funding to support outbreak preparedness, address existing epidemics, and improve  
5 workforce retention. Mechanisms to improve strategic coordination and communication  
6 between key stakeholders, including representatives of clinicians and affected populations,  
7 is vital to ensure clear and consistent messaging. Finally, sustained investment in  
8 coordinated, equitable partnerships between government agencies, clinical services, and  
9 communities on the ground are essential to deliver evidence-based interventions to support  
10 healthcare professional wellbeing, sustain patient-provider relationships, and promote  
11 psychological resilience.  
12  
13  
14  
15  
16  
17  
18  
19  
20  
21  
22  
23  
24  
25  
26  
27  
28  
29  
30  
31  
32  
33  
34  
35  
36  
37  
38  
39  
40  
41  
42  
43  
44  
45  
46  
47  
48  
49  
50  
51  
52  
53  
54  
55  
56  
57  
58  
59  
60

## Acknowledgements

With thanks to the participants for contributing their time and sharing their experiences; to the Share-Net international collaboration for their support in disseminating the survey; and to Dr Anthony K J Smith for his support on the qualitative analysis for the entire survey sample, which has helped to inform this study's findings.

## Contributors

RH was responsible for qualitative analysis of the open text data, interpretation of the results, and drafting of the original manuscript and subsequent versions. FD contributed to the interpretation of the results, the drafting of the original manuscript, and with comments and input to subsequent versions. MS was responsible for the statistical analysis of the closed text data and interpretation of the results and contributed to the design of the study and with comments and input on different drafts of the manuscript. SP contributed to the qualitative analysis of the open text data and interpretation of the results, and with comments and input on different drafts of the manuscript. VA was responsible with CO for conceiving and designing the study, contributed to the interpretation of results, and with comments and input on different drafts of the manuscript. CD contributed to the design of the study, supported data collection, and contributed to the interpretation of the results and with comments and input on different drafts of the manuscript. LW contributed to the design of the study, supported data collection, and contributed to the interpretation of the results and with comments and input on different drafts of the manuscript. JA contributed to the design of the study, supported data collection, and contributed to the interpretation of the results and with comments and input on different drafts of the manuscript. CO was responsible with VA for conceiving and designing the study, contributed to the interpretation of results, and with comments and input on different drafts of the manuscript. All authors approved the final version and agreed to be accountable for all aspects of the work.

## Data sharing statement

The authors commit to making the relevant anonymised participant level data available on reasonable request and following consultation with the Queen Mary University of London Ethics of Research Committee.

## Copyright statement

The Corresponding Author has the right to grant on behalf of all authors and does grant on behalf of all authors, an exclusive licence (or non-exclusive for government employees) on a worldwide basis to the BMJ Publishing Group Ltd to permit this article (if accepted) to be published in BMJ editions and any other BMJPG products and sublicences such use and exploit all subsidiary rights, as set out in our licence.

## Competing interests statement

All authors have completed the Unified Competing Interest form (available on request from the corresponding author) and declare no support from any organisation for the submitted work.

VA has received speaker fees from ViiV, Gilead and MSD. CD has received speaker fees from ViiV and MSD. JA has received speaker fees, consultancy fees and support for conference attendance from Gilead Sciences and ViiV Healthcare. CO has received research grants paid to her institution from MSD, GSK, Gilead, ViiV, AstraZeneca, and honoraria from MSD, GSK, Gilead, and ViiV.

JA holds a consultant physician appointment at Homerton Healthcare NHS Foundation Trust and is Chair of the National AIDS Trust. LW is former president of the British HIV Association. CD is current president of the British Association for Sexual Health and HIV.

All other authors have no further competing interests to declare.

## Transparency statement

The lead author (the manuscript's guarantor) affirms that the manuscript is an honest, accurate, and transparent account of the study being reported; that no important aspects of the study have been omitted; and that any discrepancies from the study as planned (and, if relevant, registered) have been explained.

## Ethical approval

The study received ethical approval from the Queen Mary University of London Ethics of Research Committee (QMERC22.297).

## Funding

The authors received no funding for the research, authorship, and/or publication of this article.

## References

1. Shaw A, Flott K, Fontana G, Durkin M, Darzi A. No patient safety without health worker safety. *The Lancet*. 2020 Nov 14;396(10262):1541–3.
2. Billings J, Ching BCF, Gkofa V, Greene T, Bloomfield M. Experiences of frontline healthcare workers and their views about support during COVID-19 and previous pandemics: a systematic review and qualitative meta-synthesis. *BMC Health Serv Res*. 2021 Sep 6;21(1):923.
3. Vindrola-Padros C, Andrews L, Dowrick A, Djellouli N, Fillmore H, Gonzalez EB, et al. Perceptions and experiences of healthcare workers during the COVID-19 pandemic in the UK. *BMJ Open*. 2020;10(11):e040503.
4. Hoernke K, Djellouli N, Andrews L, Lewis-Jackson S, Manby L, Martin S, et al. Frontline healthcare workers' experiences with personal protective equipment during the COVID-19 pandemic in the UK: a rapid qualitative appraisal. *BMJ Open*. 2021;11(1):e046199.
5. Grailey K, Lound A, Brett S. Lived experiences of healthcare workers on the front line during the COVID-19 pandemic: a qualitative interview study. *BMJ Open*. 2021;11(12):e053680.
6. World Health Organization. WHO Director-General declares the ongoing monkeypox outbreak a Public Health Emergency of International Concern [Internet]. Available from: <https://www.who.int/europe/news/item/23-07-2022-who-director-general-declares-the-ongoing-monkeypox-outbreak-a-public-health-event-of-international-concern> [accessed 9 July 2023]
7. Golden MR, Wasserheit JN. Monkeypox — A Sobering Sentinel for Pandemic Preparedness and Sexual Health System Capacity. *N Engl J Med*. 2022 Nov 17;387(20):1826–9.
8. Bunge EM, Hoet B, Chen L, Lienert F, Weidenthaler H, Baer LR, et al. The changing epidemiology of human monkeypox—A potential threat? A systematic review. *PLoS Negl Trop Dis*. 2022 Feb 11;16(2):e0010141.
9. Titanji BK, Tegomoh B, Nematollahi S, Konomos M, Kulkarni PA. Monkeypox: A Contemporary Review for Healthcare Professionals. *Open Forum Infect Dis*. 2022 Jun 23;9(7):ofac310.
10. Beer EM, Rao VB. A systematic review of the epidemiology of human monkeypox outbreaks and implications for outbreak strategy. *PLoS Negl Trop Dis*. 2019 Oct 16;13(10):e0007791.
11. Centers for Disease Control and Prevention (CDC). Mpox in the U.S. [Internet]. 2023. Available from: <https://www.cdc.gov/poxvirus/mpox/clinicians/vaccines/vaccine-considerations.html> [accessed 9 July 2023]

12. Fine PEM, Jezek Z, Grab B, Dixon H. The Transmission Potential of Monkeypox Virus in Human Populations. *Int J Epidemiol*. 1988 Sep 1;17(3):643–50.
13. Kluge H, Ammon A. Monkeypox in Europe and beyond – tackling a neglected disease together. Vol. 27, *Eurosurveillance*. 2022. p. 2200482.
14. Thornhill JP, Barkati S, Walmsley S, Rockstroh J, Antinori A, Harrison LB, et al. Monkeypox Virus Infection in Humans across 16 Countries — April–June 2022. *N Engl J Med*. 2022 Aug 25;387(8):679–91.
15. United Kingdom Health Security Agency (UKHSA). Mpox (monkeypox) outbreak: epidemiological overview, 5 October 2023 [Internet]. Available from: <https://www.gov.uk/government/publications/monkeypox-outbreak-epidemiological-overview/mpox-monkeypox-outbreak-epidemiological-overview-5-october-2023> [accessed 4 December 2023]
16. Selwyn B, Nguyen H, Cochrane E, Lim J, Cartner E, Cannon L, et al. P108 STASHH: a junior speciality association addressing the GUM recruitment crisis. *Sex Transm Infect*. 2022 Jun 1;98(Suppl 1):A72–3.
17. Royal College of Nursing (RCN). Sexual and Reproductive Health. RCN report on the impact of funding and service changes in England. [Internet]. 2018. Available from: <https://www.rcn.org.uk/Professional-Development/publications/pdf-006962> [accessed 7 July 2023]
18. Health and Social Care Committee. Sexual health: Fourteenth Report of Session 2017–19 [Internet]. 2019 Jun p. 37–9. Report No.: HC 1419. Available from: <https://publications.parliament.uk/pa/cm201719/cmselect/cmhealth/1419/1419.pdf> [accessed 7 July 2023]
19. Waters A. Sexual health services are at “breaking point” after £1bn in cuts since 2015. *BMJ*. 2022 Nov 16;379:o2766.
20. British HIV Association (BHIVA). Monkeypox - call for action from sexual health sector [Internet]. Available from: <https://www.bhiva.org/joint-letters-on-monkeypox> [accessed 26 July 2023]
21. Fleischauer AT, Kile JC, Davidson M, Fischer M, Karem KL, Teclaw R, et al. Evaluation of human-to-human transmission of monkeypox from infected patients to health care workers. *Clin Infect Dis Off Publ Infect Dis Soc Am*. 2005 Mar 1;40(5):689–94.
22. Vaughan A, Aarons E, Astbury J, Brooks T, Chand M, Flegg P, et al. Human-to-Human Transmission of Monkeypox Virus, United Kingdom, October 2018. *Emerg Infect Dis*. 2020 Apr;26(4):782–5.
23. Thornhill JP, Palich R, Ghosn J, Walmsley S, Moschese D, Cortes CP, et al. Human monkeypox virus infection in women and non-binary individuals during the 2022 outbreaks: a global case series. *The Lancet*. 2022;400(10367):1953–65.
24. SmartSurvey Ltd. SmartSurvey. Gloucester, UK; 2023.

- 1  
2  
3 25. StataCorp. Stata Statistical Software: Release 17. College Station, TX: StataCorp LLC;  
4 2021.  
5
- 6 26. Doyle L, McCabe C, Keogh B, Brady A, McCann M. An overview of the qualitative  
7 descriptive design within nursing research. *J Res Nurs JRN*. 2020 Aug;25(5):443–55.  
8
- 9 27. Papparini S, Whitacre R, Smuk M, Thornhill J, Mwendera C, Strachan S, et al. Public  
10 understanding and awareness of and response to monkeypox virus outbreak: A cross-  
11 sectional survey of the most affected communities in the United Kingdom during the 2022  
12 public health emergency. *HIV Med*. 2023;24(5):544–57.  
13
- 14 28. Lorking N, Le Bihan A, Teh YS, Smart R, Wainwright E, Pocock M. Monkeypox: A  
15 British sexual health clinic’s experience of applying lessons from the COVID-19 pandemic. *Int*  
16 *J STD AIDS*. 2023 Jun;34(7):501–4.  
17
- 18 29. Stewart J, Bartkus M, Sperring H, Ruiz-Mercado G, Johnson S, Pierre C. Monkeypox  
19 Vaccination Strategy and Missed Opportunities in STI and HIV Prevention: An Urban Sexual  
20 Health Clinic’s Experience During a Public Health Emergency. *Open Forum Infect Dis*. 2023  
21 Jan 1;10(1):ofad006.  
22
- 23 30. Lester J, Martin V, Shah, A, Chau, C, Mackay, N, Newbigging-Lister, A, et al. HIV  
24 testing, PrEP, new HIV diagnoses, and care outcomes for people accessing HIV services:  
25 2022 report. The annual official statistics data release (data to end of December 2021).  
26 London: UK Health Security Agency; 2022 Oct.  
27
- 28 31. Webb E, Rigby I, Michelen M, Dagens A, Cheng V, Rojek AM, et al. Availability, scope  
29 and quality of monkeypox clinical management guidelines globally: a systematic review. *BMJ*  
30 *Glob Health*. 2022;7(8):e009838.  
31
- 32 32. Taylor L. Monkeypox: Concerns mount over vaccine inequity. *BMJ*. 2022 Aug  
33 8;378:o1971.  
34
- 35 33. Garcia Iglesias J, Williams J, Nagington M, May T, Buijsen S, McHugh C, et al.  
36 Responding to Mpox: Communities, Communication, and Infrastructures. [Internet]. 2023.  
37 Available from: [https://theippo.co.uk/wp-content/uploads/2023/03/Responding-to-](https://theippo.co.uk/wp-content/uploads/2023/03/Responding-to-Mpox.pdf)  
38 [Mpox.pdf](https://theippo.co.uk/wp-content/uploads/2023/03/Responding-to-Mpox.pdf) [accessed 7 July 2023]  
39
- 40 34. Riad A, Drobov A, Rozmarinová J, Drapáčová P, Klugarová J, Dušek L, et al.  
41 Monkeypox Knowledge and Vaccine Hesitancy of Czech Healthcare Workers: A Health Belief  
42 Model (HBM)-Based Study. *Vaccines*. 2022 Dec;10(12):2022.  
43
- 44 35. Bates BR, Grijalva MJ. Knowledge, attitudes, and practices towards monkeypox  
45 during the 2022 outbreak: An online cross-sectional survey among clinicians in Ohio, USA. *J*  
46 *Infect Public Health*. 2022 Dec;15(12):1459–65.  
47
- 48 36. Ghazy RM, Okeh DU, Sallam M, Hussein M, Ismail HM, Yazbek S, et al. Psychological  
49 Antecedents of Healthcare Workers towards Monkeypox Vaccination in Nigeria. *Vaccines*.  
50 2022 Dec;10(12):2151.  
51  
52  
53  
54  
55  
56  
57  
58  
59  
60



- 1  
2  
3 37. Lounis M, Bencherit D, Abdelhadi S. Knowledge and awareness of Algerian  
4 healthcare workers about human monkeypox and their attitude toward its vaccination: An  
5 online cross-sectional survey. *Vacunas*. 2023 Apr 1;24(2):122–7.  
6  
7  
8 38. European Center for Disease Prevention and Control (ECDC), WHO Europe. Joint  
9 ECDC-WHO Regional Office for Europe Mpox Surveillance Bulletin [Internet]. Available from:  
10 <https://monkeypoxreport.ecdc.europa.eu/> [accessed 26 July 2023]  
11  
12  
13 39. Atkinson B, Spencer A, Onianwa O, Furneaux J, Grieves J, Nicholls I, et al.  
14 Longitudinal mpox virus surface sampling in an outpatient setting. *J Hosp Infect*. 2023 May  
15 1;135:196–8.  
16  
17 40. Gould S, Atkinson B, Onianwa O, Spencer A, Furneaux J, Grieves J, et al. Air and  
18 surface sampling for monkeypox virus in a UK hospital: an observational study. *Lancet*  
19 *Microbe*. 2022 Dec 1;3(12):e904–11.  
20  
21  
22 41. National Health Service (NHS). NHS Staff Survey National Results: National Results  
23 Briefing 2022 [Internet]. 2022. Available from:  
24 <https://www.nhsstaffsurveys.com/results/national-results/>  
25  
26  
27 42. Brier ND, Stroobants S, Vandekerckhove P, Buck ED. Factors affecting mental health  
28 of health care workers during coronavirus disease outbreaks (SARS, MERS & COVID-19): A  
29 rapid systematic review. *PLOS ONE*. 2020 Dec 15;15(12):e0244052.  
30  
31  
32 43. Wilkinson E. UK NHS staff: stressed, exhausted, burnt out. *The Lancet*. 2015 Mar  
33 7;385(9971):841–2.  
34  
35 44. Daniels K, Connolly S, Woodard R, van Stolk C, Patey J, Fong K, et al. NHS staff  
36 wellbeing: Why investing in organisational and management practices makes business sense  
37 - A rapid evidence review and economic analysis. London: EPPI Centre, UCL Social Research  
38 Institute, University College London.; 2022.  
39  
40  
41 45. Hall LH, Johnson J, Watt I, Tsipa A, O'Connor DB. Healthcare Staff Wellbeing,  
42 Burnout, and Patient Safety: A Systematic Review. *PLOS ONE*. 2016 Jul 8;11(7):e0159015.  
43  
44 46. Royal College of Physicians (RCP). 2022 census consultant data toolkit [Internet].  
45 2022. Available from: [https://www.rcplondon.ac.uk/projects/outputs/uk-2022-census-](https://www.rcplondon.ac.uk/projects/outputs/uk-2022-census-consultant-physicians)  
46 [consultant-physicians](https://www.rcplondon.ac.uk/projects/outputs/uk-2022-census-consultant-physicians) [accessed 4 December 2023]  
47  
48  
49  
50  
51  
52  
53  
54  
55  
56  
57  
58  
59  
60

STROBE Statement—Checklist of items that should be included in reports of *cross-sectional studies*

|                              | Item No | Recommendation                                                                                                                                                                                    | Page No                |
|------------------------------|---------|---------------------------------------------------------------------------------------------------------------------------------------------------------------------------------------------------|------------------------|
| <b>Title and abstract</b>    | 1       | (a) Indicate the study's design with a commonly used term in the title or the abstract                                                                                                            | 1                      |
|                              |         | (b) Provide in the abstract an informative and balanced summary of what was done and what was found                                                                                               | 2                      |
| <b>Introduction</b>          |         |                                                                                                                                                                                                   |                        |
| Background/rationale         | 2       | Explain the scientific background and rationale for the investigation being reported                                                                                                              | 4-5                    |
| Objectives                   | 3       | State specific objectives, including any prespecified hypotheses                                                                                                                                  | 2, 5                   |
| <b>Methods</b>               |         |                                                                                                                                                                                                   |                        |
| Study design                 | 4       | Present key elements of study design early in the paper                                                                                                                                           | 5                      |
| Setting                      | 5       | Describe the setting, locations, and relevant dates, including periods of recruitment, exposure, follow-up, and data collection                                                                   | 5                      |
| Participants                 | 6       | (a) Give the eligibility criteria, and the sources and methods of selection of participants                                                                                                       | 5-6                    |
| Variables                    | 7       | Clearly define all outcomes, exposures, predictors, potential confounders, and effect modifiers. Give diagnostic criteria, if applicable                                                          | SAP <sup>1</sup>       |
| Data sources/<br>measurement | 8*      | For each variable of interest, give sources of data and details of methods of assessment (measurement). Describe comparability of assessment methods if there is more than one group              | 5,<br>SAP <sup>1</sup> |
| Bias                         | 9       | Describe any efforts to address potential sources of bias                                                                                                                                         | 16                     |
| Study size                   | 10      | Explain how the study size was arrived at                                                                                                                                                         | 5                      |
| Quantitative variables       | 11      | Explain how quantitative variables were handled in the analyses. If applicable, describe which groupings were chosen and why                                                                      | 6,<br>SAP <sup>1</sup> |
| Statistical methods          | 12      | (a) Describe all statistical methods, including those used to control for confounding                                                                                                             | SAP <sup>1</sup>       |
|                              |         | (b) Describe any methods used to examine subgroups and interactions                                                                                                                               | SAP <sup>1</sup>       |
|                              |         | (c) Explain how missing data were addressed                                                                                                                                                       | SAP <sup>1</sup>       |
|                              |         | (d) If applicable, describe analytical methods taking account of sampling strategy                                                                                                                | NA                     |
|                              |         | (e) Describe any sensitivity analyses                                                                                                                                                             | NA                     |
| <b>Results</b>               |         |                                                                                                                                                                                                   |                        |
| Participants                 | 13*     | (a) Report numbers of individuals at each stage of study—eg numbers potentially eligible, examined for eligibility, confirmed eligible, included in the study, completing follow-up, and analysed | 6                      |
|                              |         | (b) Give reasons for non-participation at each stage                                                                                                                                              | NA                     |
|                              |         | (c) Consider use of a flow diagram                                                                                                                                                                | NA                     |
| Descriptive data             | 14*     | (a) Give characteristics of study participants (eg demographic, clinical, social) and information on exposures and potential confounders                                                          | 6-7                    |
|                              |         | (b) Indicate number of participants with missing data for each variable of interest                                                                                                               | NA                     |
| Outcome data                 | 15*     | Report numbers of outcome events or summary measures                                                                                                                                              | NA                     |

<sup>1</sup> Available at <https://osf.io/2bufh>

1  
2  
3  
4  
5  
6  
7  
8  
9  
10  
11  
12  
13  
14  
15  
16  
17  
18  
19  
20  
21  
22  
23  
24  
25  
26  
27  
28  
29  
30  
31  
32  
33  
34  
35  
36  
37  
38  
39  
40  
41  
42  
43  
44  
45  
46  
47  
48  
49  
50  
51  
52  
53  
54  
55  
56  
57  
58  
59  
60

|                          |    |                                                                                                                                                                                                              |       |
|--------------------------|----|--------------------------------------------------------------------------------------------------------------------------------------------------------------------------------------------------------------|-------|
| Main results             | 16 | (a) Give unadjusted estimates and, if applicable, confounder-adjusted estimates and their precision (eg, 95% confidence interval). Make clear which confounders were adjusted for and why they were included | 6-14  |
|                          |    | (b) Report category boundaries when continuous variables were categorized                                                                                                                                    | NA    |
|                          |    | (c) If relevant, consider translating estimates of relative risk into absolute risk for a meaningful time period                                                                                             | NA    |
| Other analyses           | 17 | Report other analyses done—eg analyses of subgroups and interactions, and sensitivity analyses                                                                                                               | NA    |
| <b>Discussion</b>        |    |                                                                                                                                                                                                              |       |
| Key results              | 18 | Summarise key results with reference to study objectives                                                                                                                                                     | 14-16 |
| Limitations              | 19 | Discuss limitations of the study, taking into account sources of potential bias or imprecision. Discuss both direction and magnitude of any potential bias                                                   | 16    |
| Interpretation           | 20 | Give a cautious overall interpretation of results considering objectives, limitations, multiplicity of analyses, results from similar studies, and other relevant evidence                                   | 14-16 |
| Generalisability         | 21 | Discuss the generalisability (external validity) of the study results                                                                                                                                        | 14-16 |
| <b>Other information</b> |    |                                                                                                                                                                                                              |       |
| Funding                  | 22 | Give the source of funding and the role of the funders for the present study and, if applicable, for the original study on which the present article is based                                                | 19    |

\*Give information separately for exposed and unexposed groups.

**Note:** An Explanation and Elaboration article discusses each checklist item and gives methodological background and published examples of transparent reporting. The STROBE checklist is best used in conjunction with this article (freely available on the Web sites of PLoS Medicine at <http://www.plosmedicine.org/>, Annals of Internal Medicine at <http://www.annals.org/>, and Epidemiology at <http://www.epidem.com/>). Information on the STROBE Initiative is available at [www.strobe-statement.org](http://www.strobe-statement.org).
